# Supplementary material for: Pan-cancer analysis of systematic batch effects on somatic sequence variations
Source: BMC Bioinformatics. 2017 Apr 11;18:211. doi: 10.1186/s12859-017-1627-7 (PMC5387285; doi:10.1186/s12859-017-1627-7)
Supplement: Supplementary file 2 — List of the MAFs used in the analysis. Table S2. List of 999 batch-biased variants in TCGA data. Table S3. List of batch-biased genes among the SMGs. (XLSX 111 kb) [file 12859_2017_1627_MOESM2_ESM.xlsx]

## Sheet: Table S1
Table S1. List of MAFs used in the analysis
#	Cancer type	MAF	File name	#Samples
1	BLCA	broad.mit.edu_GA_automated	broad.mit.edu__Illumina_Genome_Analyzer_DNA_Sequencing_level2	238
2	BRCA	genome.wustl.edu_GA	genome.wustl.edu__Illumina_Genome_Analyzer_DNA_Sequencing_level2	776
3	BRCA	genome.wustl.edu_GA_curated	genome.wustl.edu__IlluminaGA_curated_DNA_sequencing_level2	993
4	CESC	bcgsc.ca_HiSeq_automated	bcgsc.ca__IlluminaHiSeq_automated_DNA_sequencing_level2	199
5	CESC	genome.wustl.edu_GA_curated	genome.wustl.edu__IlluminaGA_curated_DNA_sequencing_level2	194
6	COAD	hgsc.bcm.edu_GA	hgsc.bcm.edu__Illumina_Genome_Analyzer_DNA_Sequencing_level2	219
7	GBM	broad.mit.edu_GA	broad.mit.edu__Illumina_Genome_Analyzer_DNA_Sequencing_level2	282
8	HNSC	broad.mit.edu_GA	broad.mit.edu__Illumina_Genome_Analyzer_DNA_Sequencing_level2	306
9	HNSC	broad.mit.edu_GA_automated	broad.mit.edu__IlluminaGA_automated_DNA_sequencing_level2	509
10	KIRC	broad.mit.edu_GA_automated	broad.mit.edu__IlluminaGA_automated_DNA_sequencing_level2	235
11	KIRC	hgsc.bcm.edu__Mixed	hgsc.bcm.edu__Mixed_DNA_Sequencing_level2	491
12	KIRP	broad.mit.edu_GA	broad.mit.edu__Illumina_Genome_Analyzer_DNA_Sequencing_level2	115
13	KIRP	broad.mit.edu_GA_automated	broad.mit.edu__IlluminaGA_automated_DNA_sequencing_level2	116
14	KIRP	broad.mit.edu_GA_curated	broad.mit.edu__IlluminaGA_curated_DNA_sequencing_level2	171
15	KIRP	hgsc.bcm.edu_GA_automated	hgsc.bcm.edu__IlluminaGA_automated_DNA_sequencing_level2	282
16	KIRP	hgsc.bcm.edu_GA_curated	hgsc.bcm.edu__IlluminaGA_curated_DNA_sequencing_level2	168
17	KIRP	hgsc.bcm.edu__Mixed_curated	hgsc.bcm.edu__Mixed_curated_DNA_sequencing_level2	161
18	LGG	broad.mit.edu_GA	broad.mit.edu__Illumina_Genome_Analyzer_DNA_Sequencing_level2	218
19	LGG	broad.mit.edu_GA_automated	broad.mit.edu__IlluminaGA_automated_DNA_sequencing_level2	530
20	LGG	broad.mit.edu_GA_curated	broad.mit.edu__IlluminaGA_curated_DNA_sequencing_level2	286
21	LGG	hgsc.bcm.edu_GA_automated	hgsc.bcm.edu__IlluminaGA_automated_DNA_sequencing_level2	289
22	LIHC	bcgsc.ca_HiSeq_automated	bcgsc.ca__IlluminaHiSeq_automated_DNA_sequencing_level2	202
23	LIHC	hgsc.bcm.edu_GA_automated	hgsc.bcm.edu__IlluminaGA_automated_DNA_sequencing_level2	198
24	LIHC	hgsc.bcm.edu__Mixed_curated	hgsc.bcm.edu__Mixed_curated_DNA_sequencing_level2	198
25	LUAD	broad.mit.edu_GA	broad.mit.edu__Illumina_Genome_Analyzer_DNA_Sequencing_level2	538
26	LUAD	broad.mit.edu_GA_automated	broad.mit.edu__IlluminaGA_automated_DNA_sequencing_level2	561
27	LUSC	broad.mit.edu_GA	broad.mit.edu__Illumina_Genome_Analyzer_DNA_Sequencing_level2	178
28	OV	broad.mit.edu_GA	broad.mit.edu__Illumina_Genome_Analyzer_DNA_Sequencing_level2	142
29	OV	genome.wustl.edu_GA	genome.wustl.edu__Illumina_Genome_Analyzer_DNA_Sequencing_level2	230
30	PRAD	broad.mit.edu_GA_automated	broad.mit.edu__IlluminaGA_automated_DNA_sequencing_level2	425
31	PRAD	broad.mit.edu_GA_curated	broad.mit.edu__IlluminaGA_curated_DNA_sequencing_level2	261
32	PRAD	hgsc.bcm.edu_GA_automated	hgsc.bcm.edu__IlluminaGA_automated_DNA_sequencing_level2	263
33	SARC	bcgsc.ca_HiSeq_automated	bcgsc.ca__IlluminaHiSeq_automated_DNA_sequencing_level2	259
34	SARC	bcgsc.ca__Multi-Center	bcgsc.ca__Multi-Center_Mutations_level2	259
35	SARC	broad.mit.edu_GA_automated	broad.mit.edu__IlluminaGA_automated_DNA_sequencing_level2	259
36	SARC	genome.wustl.edu_HiSeq_automated	genome.wustl.edu__IlluminaHiSeq_automated_DNA_sequencing_level2	247
37	SKCM	broad.mit.edu_GA	broad.mit.edu__Illumina_Genome_Analyzer_DNA_Sequencing_level2	341
38	SKCM	broad.mit.edu_GA_automated	broad.mit.edu__IlluminaGA_automated_DNA_sequencing_level2	364
39	SKCM	hgsc.bcm.edu_GA_automated	hgsc.bcm.edu__IlluminaGA_automated_DNA_sequencing_level2	343
40	STAD	broad.mit.edu_GA	broad.mit.edu__Illumina_Genome_Analyzer_DNA_Sequencing_level2	245
41	STAD	broad.mit.edu_GA_curated	broad.mit.edu__IlluminaGA_curated_DNA_sequencing_level2	289
42	STAD	hgsc.bcm.edu_GA_automated	broad.mit.edu__IlluminaGA_automated_DNA_sequencing_level2	379
43	THCA	broad.mit.edu_GA	broad.mit.edu__Illumina_Genome_Analyzer_DNA_Sequencing_level2	405
44	THCA	hgsc.bcm.edu_GA_automated	hgsc.bcm.edu__IlluminaGA_automated_DNA_sequencing_level2	406
45	UCEC	broad.mit.edu_GA	broad.mit.edu__Illumina_Genome_Analyzer_DNA_Sequencing_level2	194
46	UCEC	genome.wustl.edu_GA	genome.wustl.edu__Illumina_Genome_Analyzer_DNA_Sequencing_level2	248

## Sheet: Table S2
Table S2. List of batch-biased variants in TCGA data
MAF	Batch	Batch ID	Batch size	Other batch size	Bias frequency	Unbias frequency	Odds	P-value	FDR	Cancer type	Hugo_Symbol	Chrom	Start_Position	End_Position	Reference_Allele	Tumor_Seq_Allele1	Tumor_Seq_Allele2	Substitution
KIRC-broad.mit.edu_GA_automated	plate_id	886	25	210	16	9	Inf	0	0	KIRC	ABCA1	9	107593322	107593323	-	-	C	->C
KIRC-broad.mit.edu_GA_automated	plate_id	886	25	210	19	6	Inf	0	0	KIRC	ABCA6	17	67083603	67083604	-	-	G	->G
KIRC-broad.mit.edu_GA_automated	plate_id	886	25	210	21	4	Inf	0	0	KIRC	ARAP3	5	141049341	141049342	-	-	C	->C
KIRC-broad.mit.edu_GA_automated	plate_id	886	25	210	15	10	Inf	0	0	KIRC	ATP2B4	1	203667345	203667346	-	-	C	->C
KIRC-broad.mit.edu_GA_automated	plate_id	886	25	210	19	6	Inf	0	0	KIRC	C6orf25	6	31692528	31692529	-	-	C	->C
KIRC-broad.mit.edu_GA_automated	plate_id	886	25	210	15	10	Inf	0	0	KIRC	CARD8	19	48737669	48737670	-	-	C	->C
KIRC-broad.mit.edu_GA_automated	plate_id	886	25	210	19	6	Inf	0	0	KIRC	CD4	12	6924042	6924043	-	-	G	->G
KIRC-broad.mit.edu_GA_automated	plate_id	886	25	210	17	8	Inf	0	0	KIRC	CR2	1	207642043	207642044	-	-	C	->C
KIRC-broad.mit.edu_GA_automated	plate_id	886	25	210	17	8	Inf	0	0	KIRC	DCDC2	6	24205282	24205283	-	-	C	->C
KIRC-broad.mit.edu_GA_automated	plate_id	886	25	210	15	10	Inf	0	0	KIRC	DDB1	11	61094367	61094368	-	-	G	->G
KIRC-broad.mit.edu_GA_automated	plate_id	886	25	210	16	9	Inf	0	0	KIRC	DNMT1	19	10291083	10291084	-	-	G	->G
KIRC-broad.mit.edu_GA_automated	plate_id	886	25	210	15	10	Inf	0	0	KIRC	DSCAM	21	41514614	41514615	-	-	G	->G
KIRC-broad.mit.edu_GA_automated	plate_id	886	25	210	16	9	Inf	0	0	KIRC	EIF3B	7	2404085	2404086	-	-	G	->G
KIRC-broad.mit.edu_GA_automated	plate_id	886	25	210	16	9	Inf	0	0	KIRC	EPHX4	1	92511121	92511122	-	-	G	->G
KIRC-broad.mit.edu_GA_automated	plate_id	886	25	210	20	5	Inf	0	0	KIRC	FAM151A	1	55081756	55081757	-	-	G	->G
KIRC-broad.mit.edu_GA_automated	plate_id	886	25	210	18	7	Inf	0	0	KIRC	FANCE	6	35425714	35425715	-	-	C	->C
KIRC-broad.mit.edu_GA_automated	plate_id	886	25	210	15	10	Inf	0	0	KIRC	FBN2	5	127610310	127610311	-	-	C	->C
KIRC-broad.mit.edu_GA_automated	plate_id	886	25	210	16	9	Inf	0	0	KIRC	FKBP9	7	33014803	33014804	-	-	C	->C
KIRC-broad.mit.edu_GA_automated	plate_id	886	25	210	17	8	Inf	0	0	KIRC	GCNT2	6	10557409	10557410	-	-	C	->C
KIRC-broad.mit.edu_GA_automated	plate_id	886	25	210	15	10	Inf	0	0	KIRC	GLI1	12	57860074	57860075	-	-	G	->G
KIRC-broad.mit.edu_GA_automated	plate_id	886	25	210	18	7	Inf	0	0	KIRC	GRIN2B	12	14019043	14019044	-	-	G	->G
KIRC-broad.mit.edu_GA_automated	plate_id	886	25	210	20	5	Inf	0	0	KIRC	HEBP1	12	13142224	13142225	-	-	C	->C
KIRC-broad.mit.edu_GA_automated	plate_id	886	25	210	15	10	Inf	0	0	KIRC	ITGA10	1	145534121	145534122	-	-	C	->C
KIRC-broad.mit.edu_GA_automated	plate_id	886	25	210	17	8	Inf	0	0	KIRC	ITGAV	2	187521084	187521085	-	-	G	->G
KIRC-broad.mit.edu_GA_automated	plate_id	886	25	210	15	10	Inf	0	0	KIRC	KBTBD6	13	41705321	41705322	-	-	C	->C
KIRC-broad.mit.edu_GA_automated	plate_id	886	25	210	17	8	Inf	0	0	KIRC	KIAA0408	6	127767595	127767596	-	-	C	->C
KIRC-broad.mit.edu_GA_automated	plate_id	886	25	210	16	9	Inf	0	0	KIRC	KLK1	19	51326962	51326963	-	-	C	->C
KIRC-broad.mit.edu_GA_automated	plate_id	886	25	210	19	6	Inf	0	0	KIRC	MAP1B	5	71495076	71495077	-	-	C	->C
KIRC-broad.mit.edu_GA_automated	plate_id	886	25	210	15	10	Inf	0	0	KIRC	MRPL24	1	156708444	156708445	-	-	G	->G
KIRC-broad.mit.edu_GA_automated	plate_id	886	25	210	17	8	Inf	0	0	KIRC	MSI1	12	120800902	120800903	-	-	C	->C
KIRC-broad.mit.edu_GA_automated	plate_id	886	25	210	19	6	Inf	0	0	KIRC	MUC16	19	9064309	9064310	-	-	G	->G
KIRC-broad.mit.edu_GA_automated	plate_id	886	25	210	17	8	Inf	0	0	KIRC	MYO3B	2	171240258	171240259	-	-	C	->C
KIRC-broad.mit.edu_GA_automated	plate_id	886	25	210	17	8	Inf	0	0	KIRC	NAV3	12	78400511	78400512	-	-	C	->C
KIRC-broad.mit.edu_GA_automated	plate_id	886	25	210	15	10	Inf	0	0	KIRC	NCAM1	11	113076860	113076861	-	-	G	->G
KIRC-broad.mit.edu_GA_automated	plate_id	886	25	210	18	7	Inf	0	0	KIRC	NDUFA10	2	240954220	240954221	-	-	G	->G
KIRC-broad.mit.edu_GA_automated	plate_id	886	25	210	15	10	Inf	0	0	KIRC	NEUROD1	2	182542971	182542972	-	-	G	->G
KIRC-broad.mit.edu_GA_automated	plate_id	886	25	210	17	8	Inf	0	0	KIRC	NOMO1	16	14980694	14980695	-	-	C	->C
KIRC-broad.mit.edu_GA_automated	plate_id	886	25	210	17	8	Inf	0	0	KIRC	NRSN2	20	333922	333923	-	-	C	->C
KIRC-broad.mit.edu_GA_automated	plate_id	886	25	210	16	9	Inf	0	0	KIRC	OR10G8	11	123900396	123900397	-	-	C	->C
KIRC-broad.mit.edu_GA_automated	plate_id	886	25	210	18	7	Inf	0	0	KIRC	OVGP1	1	111959046	111959047	-	-	C	->C
KIRC-broad.mit.edu_GA_automated	plate_id	886	25	210	18	7	Inf	0	0	KIRC	PCDH12	5	141336747	141336748	-	-	G	->G
KIRC-broad.mit.edu_GA_automated	plate_id	886	25	210	19	6	Inf	0	0	KIRC	PHACTR1	6	13206134	13206135	-	-	G	->G
KIRC-broad.mit.edu_GA_automated	plate_id	886	25	210	19	6	Inf	0	0	KIRC	PSG7	19	43439519	43439520	-	-	C	->C
KIRC-broad.mit.edu_GA_automated	plate_id	886	25	210	15	10	Inf	0	0	KIRC	RALGAPB	20	37146232	37146233	-	-	C	->C
KIRC-broad.mit.edu_GA_automated	plate_id	886	25	210	19	6	Inf	0	0	KIRC	SEC24C	10	75525559	75525560	-	-	C	->C
KIRC-broad.mit.edu_GA_automated	plate_id	886	25	210	15	10	Inf	0	0	KIRC	SLC1A3	5	36679798	36679799	-	-	G	->G
KIRC-broad.mit.edu_GA_automated	plate_id	886	25	210	17	8	Inf	0	0	KIRC	SLPI	20	43881730	43881731	-	-	G	->G
KIRC-broad.mit.edu_GA_automated	plate_id	886	25	210	17	8	Inf	0	0	KIRC	SSX3	X	48209462	48209463	-	-	G	->G
KIRC-broad.mit.edu_GA_automated	plate_id	886	25	210	15	10	Inf	0	0	KIRC	TMX2	11	57505845	57505846	-	-	C	->C
KIRC-broad.mit.edu_GA_automated	plate_id	886	25	210	16	9	Inf	0	0	KIRC	TSHZ3	19	31769141	31769142	-	-	C	->C
KIRC-broad.mit.edu_GA_automated	plate_id	886	25	210	17	8	Inf	0	0	KIRC	TSKS	19	50243063	50243064	-	-	G	->G
KIRC-broad.mit.edu_GA_automated	plate_id	886	25	210	15	10	Inf	0	0	KIRC	XIRP2	2	168099957	168099958	-	-	G	->G
LUAD-broad.mit.edu_GA	plate_id	928	19	519	12	7	Inf	0	0	LUAD	ABCA6	17	67083603	67083604	-	-	G	->G
LUAD-broad.mit.edu_GA	plate_id	928	19	519	11	8	Inf	0	0	LUAD	ACACA	17	35600370	35600371	-	-	G	->G
LUAD-broad.mit.edu_GA	plate_id	928	19	519	13	6	Inf	0	0	LUAD	ARFGEF1	8	68128855	68128856	-	-	G	->G
LUAD-broad.mit.edu_GA	plate_id	928	19	519	13	6	Inf	0	0	LUAD	CARD8	19	48737669	48737670	-	-	C	->C
LUAD-broad.mit.edu_GA	plate_id	928	19	519	11	8	Inf	0	0	LUAD	CST1	20	23729753	23729754	-	-	C	->C
LUAD-broad.mit.edu_GA	plate_id	928	19	519	12	7	Inf	0	0	LUAD	CST4	20	23667825	23667826	-	-	C	->C
LUAD-broad.mit.edu_GA	plate_id	928	19	519	14	5	Inf	0	0	LUAD	DCDC2	6	24205282	24205283	-	-	C	->C
LUAD-broad.mit.edu_GA	plate_id	928	19	519	14	5	Inf	0	0	LUAD	DSCAM	21	41514614	41514615	-	-	G	->G
LUAD-broad.mit.edu_GA	plate_id	928	19	519	12	7	Inf	0	0	LUAD	EPHX4	1	92511121	92511122	-	-	G	->G
LUAD-broad.mit.edu_GA	plate_id	928	19	519	12	7	Inf	0	0	LUAD	FAM151A	1	55081756	55081757	-	-	G	->G
LUAD-broad.mit.edu_GA	plate_id	928	19	519	13	6	Inf	0	0	LUAD	FBN2	5	127610310	127610311	-	-	C	->C
LUAD-broad.mit.edu_GA	plate_id	928	19	519	14	5	Inf	0	0	LUAD	FBN2	5	127648336	127648337	-	-	G	->G
LUAD-broad.mit.edu_GA	plate_id	928	19	519	11	8	Inf	0	0	LUAD	FGGY	1	59812016	59812017	-	-	G	->G
LUAD-broad.mit.edu_GA	plate_id	928	19	519	11	8	Inf	0	0	LUAD	GBP7	1	89613321	89613322	-	-	C	->C
LUAD-broad.mit.edu_GA	plate_id	928	19	519	16	3	Inf	0	0	LUAD	HEBP1	12	13142224	13142225	-	-	C	->C
LUAD-broad.mit.edu_GA	plate_id	928	19	519	13	6	Inf	0	0	LUAD	INPP5D	2	234072358	234072359	-	-	C	->C
LUAD-broad.mit.edu_GA	plate_id	928	19	519	12	7	Inf	0	0	LUAD	ITGA10	1	145534121	145534122	-	-	C	->C
LUAD-broad.mit.edu_GA	plate_id	928	19	519	12	7	Inf	0	0	LUAD	ITGAV	2	187521084	187521085	-	-	G	->G
LUAD-broad.mit.edu_GA	plate_id	928	19	519	13	6	Inf	0	0	LUAD	KBTBD6	13	41705321	41705322	-	-	C	->C
LUAD-broad.mit.edu_GA	plate_id	928	19	519	12	7	Inf	0	0	LUAD	KCTD6	3	58486771	58486772	-	-	G	->G
LUAD-broad.mit.edu_GA	plate_id	928	19	519	13	6	Inf	0	0	LUAD	KIAA0408	6	127767595	127767596	-	-	C	->C
LUAD-broad.mit.edu_GA	plate_id	928	19	519	11	8	Inf	0	0	LUAD	KIAA2022	X	73963268	73963269	-	-	C	->C
LUAD-broad.mit.edu_GA	plate_id	928	19	519	12	7	Inf	0	0	LUAD	KLK1	19	51326962	51326963	-	-	C	->C
LUAD-broad.mit.edu_GA	plate_id	928	19	519	11	8	Inf	0	0	LUAD	MAP1B	5	71495076	71495077	-	-	C	->C
LUAD-broad.mit.edu_GA	plate_id	928	19	519	11	8	Inf	0	0	LUAD	MDM2	12	69233089	69233090	-	-	C	->C
LUAD-broad.mit.edu_GA	plate_id	928	19	519	12	7	Inf	0	0	LUAD	MYO3B	2	171240258	171240259	-	-	C	->C
LUAD-broad.mit.edu_GA	plate_id	928	19	519	15	4	Inf	0	0	LUAD	NCAM1	11	113076860	113076861	-	-	G	->G
LUAD-broad.mit.edu_GA	plate_id	928	19	519	11	8	Inf	0	0	LUAD	NEUROD1	2	182542971	182542972	-	-	G	->G
LUAD-broad.mit.edu_GA	plate_id	928	19	519	12	7	Inf	0	0	LUAD	OR4M2	15	22369023	22369024	-	-	G	->G
LUAD-broad.mit.edu_GA	plate_id	928	19	519	14	5	Inf	0	0	LUAD	OVGP1	1	111959046	111959047	-	-	C	->C
LUAD-broad.mit.edu_GA	plate_id	928	19	519	11	8	Inf	0	0	LUAD	PAPPA2	1	176762723	176762724	-	-	C	->C
LUAD-broad.mit.edu_GA	plate_id	928	19	519	17	2	Inf	0	0	LUAD	PHACTR1	6	13206134	13206135	-	-	G	->G
LUAD-broad.mit.edu_GA	plate_id	928	19	519	13	6	Inf	0	0	LUAD	RFX5	1	151318740	151318741	-	-	G	->G
LUAD-broad.mit.edu_GA	plate_id	928	19	519	11	8	Inf	0	0	LUAD	SEC24C	10	75525559	75525560	-	-	C	->C
LUAD-broad.mit.edu_GA	plate_id	928	19	519	11	8	Inf	0	0	LUAD	SLC6A18	5	1238077	1238077	A	A	C	A>C
LUAD-broad.mit.edu_GA	plate_id	928	19	519	13	6	Inf	0	0	LUAD	SLPI	20	43881730	43881731	-	-	G	->G
LUAD-broad.mit.edu_GA	plate_id	928	19	519	11	8	Inf	0	0	LUAD	SSX9	X	48159107	48159108	-	-	G	->G
LUAD-broad.mit.edu_GA	plate_id	928	19	519	14	5	Inf	0	0	LUAD	TCF20	22	42610947	42610948	-	-	G	->G
LUAD-broad.mit.edu_GA	plate_id	928	19	519	14	5	Inf	0	0	LUAD	UHRF1BP1L	12	100451839	100451840	-	-	G	->G
LUAD-broad.mit.edu_GA	plate_id	928	19	519	11	8	Inf	0	0	LUAD	VPS52	6	33219719	33219720	-	-	G	->G
LUAD-broad.mit.edu_GA	plate_id	928	19	519	13	6	Inf	0	0	LUAD	XIRP2	2	168099957	168099958	-	-	G	->G
LUAD-broad.mit.edu_GA	plate_id	928	19	519	15	4	1622.86	0	0	LUAD	CR2	1	207642043	207642044	-	-	C	->C
LUAD-broad.mit.edu_GA	plate_id	928	19	519	10	9	Inf	2e-16	4.25e-15	LUAD	ABCA1	9	107593322	107593323	-	-	C	->C
LUAD-broad.mit.edu_GA	plate_id	928	19	519	10	9	Inf	2e-16	4.25e-15	LUAD	ADAM23	2	207460860	207460861	-	-	C	->C
LUAD-broad.mit.edu_GA	plate_id	928	19	519	10	9	Inf	2e-16	4.25e-15	LUAD	ATP12A	13	25262563	25262564	-	-	G	->G
LUAD-broad.mit.edu_GA	plate_id	928	19	519	10	9	Inf	2e-16	4.25e-15	LUAD	C6	5	41181559	41181560	-	-	C	->C
LUAD-broad.mit.edu_GA	plate_id	928	19	519	10	9	Inf	2e-16	4.25e-15	LUAD	FAM104A	17	71223356	71223357	-	-	G	->G
LUAD-broad.mit.edu_GA	plate_id	928	19	519	10	9	Inf	2e-16	4.25e-15	LUAD	GCNT4	5	74324982	74324983	-	-	G	->G
LUAD-broad.mit.edu_GA	plate_id	928	19	519	10	9	Inf	2e-16	4.25e-15	LUAD	2016-03-10	17	60814265	60814266	-	-	C	->C
LUAD-broad.mit.edu_GA	plate_id	928	19	519	10	9	Inf	2e-16	4.25e-15	LUAD	MRPL50	9	104152774	104152775	-	-	G	->G
LUAD-broad.mit.edu_GA	plate_id	928	19	519	10	9	Inf	2e-16	4.25e-15	LUAD	NDUFA10	2	240954220	240954221	-	-	G	->G
LUAD-broad.mit.edu_GA	plate_id	928	19	519	10	9	Inf	2e-16	4.25e-15	LUAD	NRXN3	14	79933747	79933747	T	T	G	T>G
LUAD-broad.mit.edu_GA	plate_id	928	19	519	10	9	Inf	2e-16	4.25e-15	LUAD	PIAS3	1	145584022	145584023	-	-	C	->C
LUAD-broad.mit.edu_GA	plate_id	928	19	519	10	9	Inf	2e-16	4.25e-15	LUAD	RSBN1L	7	77379331	77379331	T	T	G	T>G
LUAD-broad.mit.edu_GA	plate_id	928	19	519	10	9	Inf	2e-16	4.25e-15	LUAD	SLC1A3	5	36679798	36679799	-	-	G	->G
LUAD-broad.mit.edu_GA	plate_id	928	19	519	10	9	Inf	2e-16	4.25e-15	LUAD	TRPV5	7	142612493	142612494	-	-	C	->C
LUAD-broad.mit.edu_GA	plate_id	928	19	519	10	9	Inf	2e-16	4.25e-15	LUAD	TRUB1	10	116730191	116730192	-	-	C	->C
LUAD-broad.mit.edu_GA	plate_id	928	19	519	10	9	Inf	2e-16	4.25e-15	LUAD	UNC5C	4	96140293	96140294	-	-	G	->G
LUAD-broad.mit.edu_GA	plate_id	928	19	519	10	9	Inf	2e-16	4.25e-15	LUAD	VPS13D	1	12422832	12422833	-	-	C	->C
KIRC-broad.mit.edu_GA_automated	plate_id	886	25	210	14	11	Inf	4e-16	1.13e-14	KIRC	ALOX12	17	6903739	6903740	-	-	C	->C
KIRC-broad.mit.edu_GA_automated	plate_id	886	25	210	14	11	Inf	4e-16	1.13e-14	KIRC	ARFGEF1	8	68128855	68128856	-	-	G	->G
KIRC-broad.mit.edu_GA_automated	plate_id	886	25	210	14	11	Inf	4e-16	1.13e-14	KIRC	ARID1A	1	27105930	27105931	-	-	G	->G
KIRC-broad.mit.edu_GA_automated	plate_id	886	25	210	14	11	Inf	4e-16	1.13e-14	KIRC	C15orf52	15	40630771	40630772	-	-	G	->G
KIRC-broad.mit.edu_GA_automated	plate_id	886	25	210	14	11	Inf	4e-16	1.13e-14	KIRC	CA10	17	50008356	50008357	-	-	C	->C
KIRC-broad.mit.edu_GA_automated	plate_id	886	25	210	14	11	Inf	4e-16	1.13e-14	KIRC	CCDC136	7	128457829	128457830	-	-	C	->C
KIRC-broad.mit.edu_GA_automated	plate_id	886	25	210	14	11	Inf	4e-16	1.13e-14	KIRC	FGGY	1	59812016	59812017	-	-	G	->G
KIRC-broad.mit.edu_GA_automated	plate_id	886	25	210	14	11	Inf	4e-16	1.13e-14	KIRC	GALNT16	14	69800299	69800300	-	-	G	->G
KIRC-broad.mit.edu_GA_automated	plate_id	886	25	210	14	11	Inf	4e-16	1.13e-14	KIRC	GCNT4	5	74324982	74324983	-	-	G	->G
KIRC-broad.mit.edu_GA_automated	plate_id	886	25	210	14	11	Inf	4e-16	1.13e-14	KIRC	MOG	6	29627216	29627217	-	-	C	->C
KIRC-broad.mit.edu_GA_automated	plate_id	886	25	210	14	11	Inf	4e-16	1.13e-14	KIRC	MT4	16	56602768	56602769	-	-	C	->C
KIRC-broad.mit.edu_GA_automated	plate_id	886	25	210	14	11	Inf	4e-16	1.13e-14	KIRC	MTMR4	17	56590245	56590246	-	-	G	->G
KIRC-broad.mit.edu_GA_automated	plate_id	886	25	210	14	11	Inf	4e-16	1.13e-14	KIRC	OR4M2	15	22369023	22369024	-	-	G	->G
KIRC-broad.mit.edu_GA_automated	plate_id	886	25	210	14	11	Inf	4e-16	1.13e-14	KIRC	OR4S1	11	48328524	48328525	-	-	C	->C
KIRC-broad.mit.edu_GA_automated	plate_id	886	25	210	14	11	Inf	4e-16	1.13e-14	KIRC	SSX3	X	48207024	48207025	-	-	C	->C
KIRC-broad.mit.edu_GA_automated	plate_id	886	25	210	14	11	Inf	4e-16	1.13e-14	KIRC	UNC5C	4	96140293	96140294	-	-	G	->G
LUAD-broad.mit.edu_GA	plate_id	928	19	519	10	9	526.991	1.9e-15	3.61e-14	LUAD	GRIN2B	12	14019043	14019044	-	-	G	->G
LUAD-broad.mit.edu_GA	plate_id	928	19	519	10	9	526.991	1.9e-15	3.61e-14	LUAD	HPGDS	4	95223320	95223321	-	-	C	->C
LUAD-broad.mit.edu_GA	plate_id	928	19	519	10	9	526.991	1.9e-15	3.61e-14	LUAD	KCNB1	20	47989771	47989772	-	-	G	->G
LUAD-broad.mit.edu_GA	plate_id	928	19	519	10	9	526.991	1.9e-15	3.61e-14	LUAD	RALGAPB	20	37146232	37146233	-	-	C	->C
LUAD-broad.mit.edu_GA	plate_id	928	19	519	10	9	526.991	1.9e-15	3.61e-14	LUAD	SIPA1L2	1	232650637	232650638	-	-	G	->G
LUAD-broad.mit.edu_GA	plate_id	928	19	519	10	9	526.991	1.9e-15	3.61e-14	LUAD	UHRF1BP1	6	34791081	34791082	-	-	C	->C
KIRC-broad.mit.edu_GA_automated	plate_id	886	25	210	13	12	Inf	6.8e-15	1.42e-13	KIRC	BPIFC	22	32833840	32833840	T	T	A	T>A
KIRC-broad.mit.edu_GA_automated	plate_id	886	25	210	13	12	Inf	6.8e-15	1.42e-13	KIRC	BTRC	10	103310572	103310573	-	-	C	->C
KIRC-broad.mit.edu_GA_automated	plate_id	886	25	210	13	12	Inf	6.8e-15	1.42e-13	KIRC	C3	19	6697480	6697481	-	-	G	->G
KIRC-broad.mit.edu_GA_automated	plate_id	886	25	210	13	12	Inf	6.8e-15	1.42e-13	KIRC	CACNA1S	1	201046125	201046126	-	-	C	->C
KIRC-broad.mit.edu_GA_automated	plate_id	886	25	210	13	12	Inf	6.8e-15	1.42e-13	KIRC	CCDC91	12	28458580	28458580	A	A	T	A>T
KIRC-broad.mit.edu_GA_automated	plate_id	886	25	210	13	12	Inf	6.8e-15	1.42e-13	KIRC	CEACAM5	19	42224865	42224866	-	-	C	->C
KIRC-broad.mit.edu_GA_automated	plate_id	886	25	210	13	12	Inf	6.8e-15	1.42e-13	KIRC	CPN1	10	101816832	101816833	-	-	G	->G
KIRC-broad.mit.edu_GA_automated	plate_id	886	25	210	13	12	Inf	6.8e-15	1.42e-13	KIRC	CST4	20	23667825	23667826	-	-	C	->C
KIRC-broad.mit.edu_GA_automated	plate_id	886	25	210	13	12	Inf	6.8e-15	1.42e-13	KIRC	DDX17	22	38895454	38895455	-	-	C	->C
KIRC-broad.mit.edu_GA_automated	plate_id	886	25	210	13	12	Inf	6.8e-15	1.42e-13	KIRC	DPP3	11	66272154	66272155	-	-	C	->C
KIRC-broad.mit.edu_GA_automated	plate_id	886	25	210	13	12	Inf	6.8e-15	1.42e-13	KIRC	GRK7	3	141535707	141535708	-	-	G	->G
KIRC-broad.mit.edu_GA_automated	plate_id	886	25	210	13	12	Inf	6.8e-15	1.42e-13	KIRC	HTR1E	6	87725846	87725847	-	-	C	->C
KIRC-broad.mit.edu_GA_automated	plate_id	886	25	210	13	12	Inf	6.8e-15	1.42e-13	KIRC	KCTD6	3	58486771	58486772	-	-	G	->G
KIRC-broad.mit.edu_GA_automated	plate_id	886	25	210	13	12	Inf	6.8e-15	1.42e-13	KIRC	MDM2	12	69233089	69233090	-	-	C	->C
KIRC-broad.mit.edu_GA_automated	plate_id	886	25	210	13	12	Inf	6.8e-15	1.42e-13	KIRC	NEUROD4	12	55421127	55421128	-	-	C	->C
KIRC-broad.mit.edu_GA_automated	plate_id	886	25	210	13	12	Inf	6.8e-15	1.42e-13	KIRC	OR4N5	14	20612063	20612064	-	-	C	->C
KIRC-broad.mit.edu_GA_automated	plate_id	886	25	210	13	12	Inf	6.8e-15	1.42e-13	KIRC	OSBPL2	20	60854257	60854258	-	-	C	->C
KIRC-broad.mit.edu_GA_automated	plate_id	886	25	210	13	12	Inf	6.8e-15	1.42e-13	KIRC	PAFAH1B1	17	2583499	2583500	-	-	G	->G
KIRC-broad.mit.edu_GA_automated	plate_id	886	25	210	13	12	Inf	6.8e-15	1.42e-13	KIRC	PCOLCE	7	100205413	100205414	-	-	C	->C
KIRC-broad.mit.edu_GA_automated	plate_id	886	25	210	13	12	Inf	6.8e-15	1.42e-13	KIRC	SLC13A3	20	45194969	45194970	-	-	G	->G
KIRC-broad.mit.edu_GA_automated	plate_id	886	25	210	13	12	Inf	6.8e-15	1.42e-13	KIRC	STAT2	12	56742816	56742817	-	-	G	->G
KIRC-broad.mit.edu_GA_automated	plate_id	886	25	210	13	12	Inf	6.8e-15	1.42e-13	KIRC	TBC1D22A	22	47188443	47188444	-	-	C	->C
KIRC-broad.mit.edu_GA_automated	plate_id	886	25	210	13	12	Inf	6.8e-15	1.42e-13	KIRC	TBX6	16	30100077	30100078	-	-	C	->C
KIRC-broad.mit.edu_GA_automated	plate_id	886	25	210	13	12	Inf	6.8e-15	1.42e-13	KIRC	TLR3	4	186997804	186997805	-	-	G	->G
STAD-broad.mit.edu_GA_curated	plate_id	2340	58	231	25	33	27.8426	8e-15	6.08e-12	STAD	BZRAP1	17	56386384	56386385	-	-	T	->T
LUAD-broad.mit.edu_GA	plate_id	928	19	519	9	10	Inf	9.5e-15	1.55e-13	LUAD	ADAMTS8	11	130275723	130275724	-	-	G	->G
LUAD-broad.mit.edu_GA	plate_id	928	19	519	9	10	Inf	9.5e-15	1.55e-13	LUAD	FAT1	4	187558038	187558039	-	-	G	->G
LUAD-broad.mit.edu_GA	plate_id	928	19	519	9	10	Inf	9.5e-15	1.55e-13	LUAD	GRK7	3	141535707	141535708	-	-	G	->G
LUAD-broad.mit.edu_GA	plate_id	928	19	519	9	10	Inf	9.5e-15	1.55e-13	LUAD	HAX1	1	154246356	154246357	-	-	G	->G
LUAD-broad.mit.edu_GA	plate_id	928	19	519	9	10	Inf	9.5e-15	1.55e-13	LUAD	HCRTR2	6	55039410	55039411	-	-	C	->C
LUAD-broad.mit.edu_GA	plate_id	928	19	519	9	10	Inf	9.5e-15	1.55e-13	LUAD	MLLT10	10	21962451	21962452	-	-	G	->G
LUAD-broad.mit.edu_GA	plate_id	928	19	519	9	10	Inf	9.5e-15	1.55e-13	LUAD	OLFML3	1	114523958	114523959	-	-	C	->C
LUAD-broad.mit.edu_GA	plate_id	928	19	519	9	10	Inf	9.5e-15	1.55e-13	LUAD	OR52B6	11	5602545	5602546	-	-	C	->C
LUAD-broad.mit.edu_GA	plate_id	928	19	519	9	10	Inf	9.5e-15	1.55e-13	LUAD	PAPPA	9	118982329	118982330	-	-	C	->C
LUAD-broad.mit.edu_GA	plate_id	928	19	519	9	10	Inf	9.5e-15	1.55e-13	LUAD	PRPF19	11	60666746	60666746	T	T	G	T>G
LUAD-broad.mit.edu_GA	plate_id	928	19	519	9	10	Inf	9.5e-15	1.55e-13	LUAD	SSX3	X	48209462	48209463	-	-	G	->G
LGG-broad.mit.edu_GA_automated	plate_id	A289	24	506	10	14	339.955	4.76e-14	3.28e-11	LGG	STK19	6	31939825	31939826	-	-	G	->G
LUAD-broad.mit.edu_GA	plate_id	928	19	519	9	10	430.672	9.33e-14	1.47e-12	LUAD	NCAPD3	11	134048585	134048586	-	-	G	->G
LUAD-broad.mit.edu_GA	plate_id	928	19	519	9	10	430.672	9.33e-14	1.47e-12	LUAD	OR4S1	11	48328524	48328525	-	-	C	->C
LUAD-broad.mit.edu_GA	plate_id	928	19	519	9	10	430.672	9.33e-14	1.47e-12	LUAD	PHACTR4	1	28800272	28800273	-	-	C	->C
KIRC-broad.mit.edu_GA_automated	plate_id	886	25	210	12	13	Inf	1.17e-13	1.94e-12	KIRC	AP1S1	7	100802404	100802405	-	-	G	->G
KIRC-broad.mit.edu_GA_automated	plate_id	886	25	210	12	13	Inf	1.17e-13	1.94e-12	KIRC	BSCL2	11	62458782	62458783	-	-	C	->C
KIRC-broad.mit.edu_GA_automated	plate_id	886	25	210	12	13	Inf	1.17e-13	1.94e-12	KIRC	CECR2	22	18022285	18022286	-	-	C	->C
KIRC-broad.mit.edu_GA_automated	plate_id	886	25	210	12	13	Inf	1.17e-13	1.94e-12	KIRC	DCTN1	2	74593376	74593377	-	-	G	->G
KIRC-broad.mit.edu_GA_automated	plate_id	886	25	210	12	13	Inf	1.17e-13	1.94e-12	KIRC	EFNB3	17	7612855	7612856	-	-	C	->C
KIRC-broad.mit.edu_GA_automated	plate_id	886	25	210	12	13	Inf	1.17e-13	1.94e-12	KIRC	FAM104A	17	71223356	71223357	-	-	G	->G
KIRC-broad.mit.edu_GA_automated	plate_id	886	25	210	12	13	Inf	1.17e-13	1.94e-12	KIRC	GBP7	1	89613321	89613322	-	-	C	->C
KIRC-broad.mit.edu_GA_automated	plate_id	886	25	210	12	13	Inf	1.17e-13	1.94e-12	KIRC	INPP5D	2	234072358	234072359	-	-	C	->C
KIRC-broad.mit.edu_GA_automated	plate_id	886	25	210	12	13	Inf	1.17e-13	1.94e-12	KIRC	KCNH5	14	63174302	63174303	-	-	G	->G
KIRC-broad.mit.edu_GA_automated	plate_id	886	25	210	12	13	Inf	1.17e-13	1.94e-12	KIRC	KIAA1522	1	33233494	33233495	-	-	C	->C
KIRC-broad.mit.edu_GA_automated	plate_id	886	25	210	12	13	Inf	1.17e-13	1.94e-12	KIRC	LRP1	12	57572241	57572242	-	-	G	->G
KIRC-broad.mit.edu_GA_automated	plate_id	886	25	210	12	13	Inf	1.17e-13	1.94e-12	KIRC	PHACTR4	1	28800272	28800273	-	-	C	->C
KIRC-broad.mit.edu_GA_automated	plate_id	886	25	210	12	13	Inf	1.17e-13	1.94e-12	KIRC	PIAS3	1	145584022	145584023	-	-	C	->C
KIRC-broad.mit.edu_GA_automated	plate_id	886	25	210	12	13	Inf	1.17e-13	1.94e-12	KIRC	PIAS3	1	145585532	145585533	-	-	G	->G
KIRC-broad.mit.edu_GA_automated	plate_id	886	25	210	12	13	Inf	1.17e-13	1.94e-12	KIRC	PIGO	9	35091522	35091523	-	-	G	->G
KIRC-broad.mit.edu_GA_automated	plate_id	886	25	210	12	13	Inf	1.17e-13	1.94e-12	KIRC	SLC24A6	12	113758305	113758306	-	-	G	->G
KIRC-broad.mit.edu_GA_automated	plate_id	886	25	210	12	13	Inf	1.17e-13	1.94e-12	KIRC	SLC43A3	11	57185234	57185235	-	-	G	->G
KIRC-broad.mit.edu_GA_automated	plate_id	886	25	210	12	13	Inf	1.17e-13	1.94e-12	KIRC	SMG7	1	183495729	183495729	A	A	T	A>T
KIRC-broad.mit.edu_GA_automated	plate_id	886	25	210	12	13	Inf	1.17e-13	1.94e-12	KIRC	SPDYE3	7	99912173	99912174	-	-	C	->C
KIRC-broad.mit.edu_GA_automated	plate_id	886	25	210	12	13	Inf	1.17e-13	1.94e-12	KIRC	SSX9	X	48159107	48159108	-	-	G	->G
KIRC-broad.mit.edu_GA_automated	plate_id	886	25	210	12	13	Inf	1.17e-13	1.94e-12	KIRC	TRBV4-2	7	142045511	142045512	-	-	C	->C
KIRC-broad.mit.edu_GA_automated	plate_id	886	25	210	12	13	Inf	1.17e-13	1.94e-12	KIRC	TRIML2	4	189012770	189012771	-	-	G	->G
KIRC-broad.mit.edu_GA_automated	plate_id	886	25	210	12	13	Inf	1.17e-13	1.94e-12	KIRC	ZNF175	19	52090436	52090437	-	-	G	->G
LUAD-broad.mit.edu_GA	plate_id	928	19	519	8	11	Inf	4.58e-13	5.4e-12	LUAD	ACSM2A	16	20489924	20489925	-	-	C	->C
LUAD-broad.mit.edu_GA	plate_id	928	19	519	8	11	Inf	4.58e-13	5.4e-12	LUAD	ACSM2B	16	20556547	20556548	-	-	G	->G
LUAD-broad.mit.edu_GA	plate_id	928	19	519	8	11	Inf	4.58e-13	5.4e-12	LUAD	ARID1A	1	27105930	27105931	-	-	G	->G
LUAD-broad.mit.edu_GA	plate_id	928	19	519	8	11	Inf	4.58e-13	5.4e-12	LUAD	CA10	17	50008356	50008357	-	-	C	->C
LUAD-broad.mit.edu_GA	plate_id	928	19	519	8	11	Inf	4.58e-13	5.4e-12	LUAD	CACNA1S	1	201046125	201046126	-	-	C	->C
LUAD-broad.mit.edu_GA	plate_id	928	19	519	8	11	Inf	4.58e-13	5.4e-12	LUAD	EXOC2	6	637793	637794	-	-	G	->G
LUAD-broad.mit.edu_GA	plate_id	928	19	519	8	11	Inf	4.58e-13	5.4e-12	LUAD	GLI1	12	57860074	57860075	-	-	G	->G
LUAD-broad.mit.edu_GA	plate_id	928	19	519	8	11	Inf	4.58e-13	5.4e-12	LUAD	ITSN1	21	35122566	35122567	-	-	C	->C
LUAD-broad.mit.edu_GA	plate_id	928	19	519	8	11	Inf	4.58e-13	5.4e-12	LUAD	KCNH5	14	63174302	63174303	-	-	G	->G
LUAD-broad.mit.edu_GA	plate_id	928	19	519	8	11	Inf	4.58e-13	5.4e-12	LUAD	MAP7D3	X	135314193	135314194	-	-	G	->G
LUAD-broad.mit.edu_GA	plate_id	928	19	519	8	11	Inf	4.58e-13	5.4e-12	LUAD	MLH1	3	37070348	37070349	-	-	C	->C
LUAD-broad.mit.edu_GA	plate_id	928	19	519	8	11	Inf	4.58e-13	5.4e-12	LUAD	NEUROD4	12	55421127	55421128	-	-	C	->C
LUAD-broad.mit.edu_GA	plate_id	928	19	519	8	11	Inf	4.58e-13	5.4e-12	LUAD	NOMO1	16	14980694	14980695	-	-	C	->C
LUAD-broad.mit.edu_GA	plate_id	928	19	519	8	11	Inf	4.58e-13	5.4e-12	LUAD	OR10G8	11	123900396	123900397	-	-	C	->C
LUAD-broad.mit.edu_GA	plate_id	928	19	519	8	11	Inf	4.58e-13	5.4e-12	LUAD	OR10Z1	1	158576486	158576487	-	-	G	->G
LUAD-broad.mit.edu_GA	plate_id	928	19	519	8	11	Inf	4.58e-13	5.4e-12	LUAD	PCDH12	5	141336747	141336748	-	-	G	->G
LUAD-broad.mit.edu_GA	plate_id	928	19	519	8	11	Inf	4.58e-13	5.4e-12	LUAD	PIK3C2B	1	204438071	204438072	-	-	G	->G
LUAD-broad.mit.edu_GA	plate_id	928	19	519	8	11	Inf	4.58e-13	5.4e-12	LUAD	PIK3R3	1	46546323	46546324	-	-	C	->C
LUAD-broad.mit.edu_GA	plate_id	928	19	519	8	11	Inf	4.58e-13	5.4e-12	LUAD	PSD3	8	18413784	18413785	-	-	G	->G
LUAD-broad.mit.edu_GA	plate_id	928	19	519	8	11	Inf	4.58e-13	5.4e-12	LUAD	RBL2	16	53504347	53504348	-	-	G	->G
LUAD-broad.mit.edu_GA	plate_id	928	19	519	8	11	Inf	4.58e-13	5.4e-12	LUAD	RDX	11	110104136	110104137	-	-	G	->G
LUAD-broad.mit.edu_GA	plate_id	928	19	519	8	11	Inf	4.58e-13	5.4e-12	LUAD	SALL2	14	21992275	21992276	-	-	G	->G
LUAD-broad.mit.edu_GA	plate_id	928	19	519	8	11	Inf	4.58e-13	5.4e-12	LUAD	SSH2	17	27959374	27959375	-	-	G	->G
LUAD-broad.mit.edu_GA	plate_id	928	19	519	8	11	Inf	4.58e-13	5.4e-12	LUAD	TDRD10	1	154493907	154493908	-	-	C	->C
LUAD-broad.mit.edu_GA	plate_id	928	19	519	8	11	Inf	4.58e-13	5.4e-12	LUAD	TLR3	4	186997804	186997805	-	-	G	->G
LUAD-broad.mit.edu_GA	plate_id	928	19	519	8	11	Inf	4.58e-13	5.4e-12	LUAD	USP9X	X	40982956	40982957	-	-	C	->C
LUAD-broad.mit.edu_GA	plate_id	928	19	519	8	11	Inf	4.58e-13	5.4e-12	LUAD	ZMYND12	1	42898878	42898879	-	-	G	->G
LUAD-broad.mit.edu_GA	plate_id	928	19	519	9	10	216.402	5.05e-13	5.84e-12	LUAD	EEF1B2	2	207025366	207025366	G	G	A	G>A
LUAD-broad.mit.edu_GA	plate_id	928	19	519	9	10	216.402	5.05e-13	5.84e-12	LUAD	SAMD7	3	169646267	169646268	-	-	G	->G
KIRC-broad.mit.edu_GA_automated	plate_id	886	25	210	11	14	Inf	1.87e-12	2.37e-11	KIRC	ACSM2B	16	20556547	20556548	-	-	G	->G
KIRC-broad.mit.edu_GA_automated	plate_id	886	25	210	11	14	Inf	1.87e-12	2.37e-11	KIRC	ACTA1	1	229567546	229567547	-	-	C	->C
KIRC-broad.mit.edu_GA_automated	plate_id	886	25	210	11	14	Inf	1.87e-12	2.37e-11	KIRC	ADCY10	1	167865905	167865906	-	-	G	->G
KIRC-broad.mit.edu_GA_automated	plate_id	886	25	210	11	14	Inf	1.87e-12	2.37e-11	KIRC	ANTXR1	2	69409763	69409764	-	-	C	->C
KIRC-broad.mit.edu_GA_automated	plate_id	886	25	210	11	14	Inf	1.87e-12	2.37e-11	KIRC	APIP	11	34904908	34904909	-	-	C	->C
KIRC-broad.mit.edu_GA_automated	plate_id	886	25	210	11	14	Inf	1.87e-12	2.37e-11	KIRC	ARAP3	5	141049509	141049510	-	-	G	->G
KIRC-broad.mit.edu_GA_automated	plate_id	886	25	210	11	14	Inf	1.87e-12	2.37e-11	KIRC	BEST3	12	70049361	70049362	-	-	G	->G
KIRC-broad.mit.edu_GA_automated	plate_id	886	25	210	11	14	Inf	1.87e-12	2.37e-11	KIRC	C16orf70	16	67180988	67180989	-	-	C	->C
KIRC-broad.mit.edu_GA_automated	plate_id	886	25	210	11	14	Inf	1.87e-12	2.37e-11	KIRC	C6	5	41181559	41181560	-	-	C	->C
KIRC-broad.mit.edu_GA_automated	plate_id	886	25	210	11	14	Inf	1.87e-12	2.37e-11	KIRC	CCS	11	66366957	66366958	-	-	G	->G
r5w2`	plate_id	886	25	210	11	14	Inf	1.87e-12	2.37e-11	KIRC	CSF3R	1	36935322	36935323	-	-	G	->G
KIRC-broad.mit.edu_GA_automated	plate_id	886	25	210	11	14	Inf	1.87e-12	2.37e-11	KIRC	DGKA	12	56347513	56347514	-	-	C	->C
KIRC-broad.mit.edu_GA_automated	plate_id	886	25	210	11	14	Inf	1.87e-12	2.37e-11	KIRC	EP300	22	41574678	41574679	-	-	C	->C
KIRC-broad.mit.edu_GA_automated	plate_id	886	25	210	11	14	Inf	1.87e-12	2.37e-11	KIRC	FAM193A	4	2661592	2661593	-	-	C	->C
KIRC-broad.mit.edu_GA_automated	plate_id	886	25	210	11	14	Inf	1.87e-12	2.37e-11	KIRC	HCRTR2	6	55039410	55039411	-	-	C	->C
KIRC-broad.mit.edu_GA_automated	plate_id	886	25	210	11	14	Inf	1.87e-12	2.37e-11	KIRC	IGF1R	15	99251108	99251109	-	-	G	->G
KIRC-broad.mit.edu_GA_automated	plate_id	886	25	210	11	14	Inf	1.87e-12	2.37e-11	KIRC	IGSF9	1	159904586	159904587	-	-	G	->G
KIRC-broad.mit.edu_GA_automated	plate_id	886	25	210	11	14	Inf	1.87e-12	2.37e-11	KIRC	IKZF4	12	56429092	56429093	-	-	G	->G
KIRC-broad.mit.edu_GA_automated	plate_id	886	25	210	11	14	Inf	1.87e-12	2.37e-11	KIRC	KIAA1191	5	175774701	175774702	-	-	G	->G
KIRC-broad.mit.edu_GA_automated	plate_id	886	25	210	11	14	Inf	1.87e-12	2.37e-11	KIRC	NAPSA	19	50862305	50862306	-	-	C	->C
KIRC-broad.mit.edu_GA_automated	plate_id	886	25	210	11	14	Inf	1.87e-12	2.37e-11	KIRC	NAV1	1	201779175	201779176	-	-	C	->C
KIRC-broad.mit.edu_GA_automated	plate_id	886	25	210	11	14	Inf	1.87e-12	2.37e-11	KIRC	OR52B6	11	5602545	5602546	-	-	C	->C
KIRC-broad.mit.edu_GA_automated	plate_id	886	25	210	11	14	Inf	1.87e-12	2.37e-11	KIRC	PAPPA	9	118982329	118982330	-	-	C	->C
KIRC-broad.mit.edu_GA_automated	plate_id	886	25	210	11	14	Inf	1.87e-12	2.37e-11	KIRC	PCBP2	12	53856277	53856278	-	-	C	->C
KIRC-broad.mit.edu_GA_automated	plate_id	886	25	210	11	14	Inf	1.87e-12	2.37e-11	KIRC	PPP2R2B	5	145969651	145969652	-	-	C	->C
KIRC-broad.mit.edu_GA_automated	plate_id	886	25	210	11	14	Inf	1.87e-12	2.37e-11	KIRC	RNF220	1	44878032	44878033	-	-	C	->C
KIRC-broad.mit.edu_GA_automated	plate_id	886	25	210	11	14	Inf	1.87e-12	2.37e-11	KIRC	SGK196	8	42958728	42958729	-	-	C	->C
KIRC-broad.mit.edu_GA_automated	plate_id	886	25	210	11	14	Inf	1.87e-12	2.37e-11	KIRC	SH2D3A	19	6755179	6755180	-	-	G	->G
KIRC-broad.mit.edu_GA_automated	plate_id	886	25	210	11	14	Inf	1.87e-12	2.37e-11	KIRC	SUPT16H	14	21820849	21820850	-	-	G	->G
KIRC-broad.mit.edu_GA_automated	plate_id	886	25	210	11	14	Inf	1.87e-12	2.37e-11	KIRC	TCF20	22	42610947	42610948	-	-	G	->G
KIRC-broad.mit.edu_GA_automated	plate_id	886	25	210	11	14	Inf	1.87e-12	2.37e-11	KIRC	TM9SF4	20	30737490	30737491	-	-	C	->C
KIRC-broad.mit.edu_GA_automated	plate_id	886	25	210	11	14	Inf	1.87e-12	2.37e-11	KIRC	UHRF1BP1L	12	100451839	100451840	-	-	G	->G
KIRC-broad.mit.edu_GA_automated	plate_id	886	25	210	11	14	Inf	1.87e-12	2.37e-11	KIRC	VWF	12	6153463	6153464	-	-	G	->G
KIRC-broad.mit.edu_GA_automated	plate_id	886	25	210	11	14	Inf	1.87e-12	2.37e-11	KIRC	ZCCHC12	X	117960135	117960136	-	-	C	->C
KIRC-broad.mit.edu_GA_automated	plate_id	886	25	210	11	14	Inf	1.87e-12	2.37e-11	KIRC	ZEB1	10	31809832	31809833	-	-	G	->G
KIRC-broad.mit.edu_GA_automated	plate_id	966	27	208	14	13	52.4316	4.04e-12	5.09e-11	KIRC	IL32	16	3119304	3119305	-	-	G	->G
LUAD-broad.mit.edu_GA	plate_id	928	19	519	8	11	350.722	4.04e-12	4.6e-11	LUAD	SUPT16H	14	21820849	21820850	-	-	G	->G
LUAD-broad.mit.edu_GA	plate_id	928	19	519	8	11	350.722	4.04e-12	4.6e-11	LUAD	ZEB1	10	31809832	31809833	-	-	G	->G
LGG-broad.mit.edu_GA_automated	plate_id	A289	24	506	8	16	Inf	5.02e-12	1.73e-09	LGG	STK19	6	31939829	31939830	-	-	A	->A
LUAD-broad.mit.edu_GA	plate_id	928	19	519	8	11	175.838	1.98e-11	1.94e-10	LUAD	AK310665	17	20332055	20332055	T	T	G	T>G
LUAD-broad.mit.edu_GA	plate_id	928	19	519	7	12	Inf	2.02e-11	1.94e-10	LUAD	AKAP6	14	32902724	32902725	-	-	C	->C
LUAD-broad.mit.edu_GA	plate_id	928	19	519	7	12	Inf	2.02e-11	1.94e-10	LUAD	AKAP9	7	91732038	91732039	-	-	G	->G
LUAD-broad.mit.edu_GA	plate_id	928	19	519	7	12	Inf	2.02e-11	1.94e-10	LUAD	CACHD1	1	65157116	65157117	-	-	C	->C
LUAD-broad.mit.edu_GA	plate_id	928	19	519	7	12	Inf	2.02e-11	1.94e-10	LUAD	CD4	12	6924042	6924043	-	-	G	->G
LUAD-broad.mit.edu_GA	plate_id	928	19	519	7	12	Inf	2.02e-11	1.94e-10	LUAD	EXOC4	7	133682284	133682285	-	-	C	->C
LUAD-broad.mit.edu_GA	plate_id	928	19	519	7	12	Inf	2.02e-11	1.94e-10	LUAD	FKBP9	7	33014803	33014804	-	-	C	->C
LUAD-broad.mit.edu_GA	plate_id	928	19	519	7	12	Inf	2.02e-11	1.94e-10	LUAD	HECTD2	10	93272060	93272061	-	-	C	->C
LUAD-broad.mit.edu_GA	plate_id	928	19	519	7	12	Inf	2.02e-11	1.94e-10	LUAD	IGSF11	3	118647520	118647521	-	-	G	->G
LUAD-broad.mit.edu_GA	plate_id	928	19	519	7	12	Inf	2.02e-11	1.94e-10	LUAD	IGSF9B	11	133807826	133807827	-	-	G	->G
LUAD-broad.mit.edu_GA	plate_id	928	19	519	7	12	Inf	2.02e-11	1.94e-10	LUAD	IL1R2	2	102638681	102638682	-	-	C	->C
LUAD-broad.mit.edu_GA	plate_id	928	19	519	7	12	Inf	2.02e-11	1.94e-10	LUAD	JAK1	1	65325832	65325833	-	-	G	->G
LUAD-broad.mit.edu_GA	plate_id	928	19	519	7	12	Inf	2.02e-11	1.94e-10	LUAD	KCNH4	17	40328258	40328259	-	-	C	->C
LUAD-broad.mit.edu_GA	plate_id	928	19	519	7	12	Inf	2.02e-11	1.94e-10	LUAD	KEL	7	142639979	142639980	-	-	C	->C
LUAD-broad.mit.edu_GA	plate_id	928	19	519	7	12	Inf	2.02e-11	1.94e-10	LUAD	MOCS2	5	52402939	52402940	-	-	G	->G
LUAD-broad.mit.edu_GA	plate_id	928	19	519	7	12	Inf	2.02e-11	1.94e-10	LUAD	PAMR1	11	35513669	35513670	-	-	C	->C
LUAD-broad.mit.edu_GA	plate_id	928	19	519	7	12	Inf	2.02e-11	1.94e-10	LUAD	SRGAP3	3	9034599	9034600	-	-	C	->C
LUAD-broad.mit.edu_GA	plate_id	928	19	519	7	12	Inf	2.02e-11	1.94e-10	LUAD	SSX3	X	48207024	48207025	-	-	C	->C
LUAD-broad.mit.edu_GA	plate_id	928	19	519	7	12	Inf	2.02e-11	1.94e-10	LUAD	TBC1D22A	22	47188443	47188444	-	-	C	->C
LUAD-broad.mit.edu_GA	plate_id	928	19	519	7	12	Inf	2.02e-11	1.94e-10	LUAD	TSHZ3	19	31769061	31769062	-	-	C	->C
LUAD-broad.mit.edu_GA	plate_id	928	19	519	7	12	Inf	2.02e-11	1.94e-10	LUAD	TSKS	19	50243063	50243064	-	-	G	->G
KIRC-broad.mit.edu_GA_automated	plate_id	886	25	210	10	15	Inf	2.8e-11	2.81e-10	KIRC	ACSL3	2	223782769	223782769	A	A	T	A>T
KIRC-broad.mit.edu_GA_automated	plate_id	886	25	210	10	15	Inf	2.8e-11	2.81e-10	KIRC	ADAMTS8	11	130275723	130275724	-	-	G	->G
KIRC-broad.mit.edu_GA_automated	plate_id	886	25	210	10	15	Inf	2.8e-11	2.81e-10	KIRC	AKAP9	7	91732038	91732039	-	-	G	->G
KIRC-broad.mit.edu_GA_automated	plate_id	886	25	210	10	15	Inf	2.8e-11	2.81e-10	KIRC	ASIC2	17	31439004	31439005	-	-	C	->C
KIRC-broad.mit.edu_GA_automated	plate_id	886	25	210	10	15	Inf	2.8e-11	2.81e-10	KIRC	CPSF7	11	61183884	61183885	-	-	G	->G
KIRC-broad.mit.edu_GA_automated	plate_id	886	25	210	10	15	Inf	2.8e-11	2.81e-10	KIRC	DCHS1	11	6655045	6655046	-	-	G	->G
KIRC-broad.mit.edu_GA_automated	plate_id	886	25	210	10	15	Inf	2.8e-11	2.81e-10	KIRC	DCTN2	12	57927805	57927806	-	-	G	->G
KIRC-broad.mit.edu_GA_automated	plate_id	886	25	210	10	15	Inf	2.8e-11	2.81e-10	KIRC	DNMT3B	20	31384650	31384651	-	-	G	->G
KIRC-broad.mit.edu_GA_automated	plate_id	886	25	210	10	15	Inf	2.8e-11	2.81e-10	KIRC	EPOR	19	11488680	11488681	-	-	G	->G
KIRC-broad.mit.edu_GA_automated	plate_id	886	25	210	10	15	Inf	2.8e-11	2.81e-10	KIRC	FASTKD5	20	3128000	3128001	-	-	C	->C
KIRC-broad.mit.edu_GA_automated	plate_id	886	25	210	10	15	Inf	2.8e-11	2.81e-10	KIRC	FBN2	5	127648336	127648337	-	-	G	->G
KIRC-broad.mit.edu_GA_automated	plate_id	886	25	210	10	15	Inf	2.8e-11	2.81e-10	KIRC	IGSF9B	11	133807826	133807827	-	-	G	->G
KIRC-broad.mit.edu_GA_automated	plate_id	886	25	210	10	15	Inf	2.8e-11	2.81e-10	KIRC	IL1R2	2	102638681	102638682	-	-	C	->C
KIRC-broad.mit.edu_GA_automated	plate_id	886	25	210	10	15	Inf	2.8e-11	2.81e-10	KIRC	IQCC	1	32673442	32673443	-	-	G	->G
KIRC-broad.mit.edu_GA_automated	plate_id	886	25	210	10	15	Inf	2.8e-11	2.81e-10	KIRC	KSR2	12	117977604	117977605	-	-	G	->G
KIRC-broad.mit.edu_GA_automated	plate_id	886	25	210	10	15	Inf	2.8e-11	2.81e-10	KIRC	LARP1	5	154181821	154181822	-	-	G	->G
KIRC-broad.mit.edu_GA_automated	plate_id	886	25	210	10	15	Inf	2.8e-11	2.81e-10	KIRC	LETM1	4	1843235	1843236	-	-	G	->G
KIRC-broad.mit.edu_GA_automated	plate_id	886	25	210	10	15	Inf	2.8e-11	2.81e-10	KIRC	LINC00959	10	131905959	131905960	-	-	G	->G
KIRC-broad.mit.edu_GA_automated	plate_id	886	25	210	10	15	Inf	2.8e-11	2.81e-10	KIRC	LPIN3	20	39977798	39977799	-	-	C	->C
KIRC-broad.mit.edu_GA_automated	plate_id	886	25	210	10	15	Inf	2.8e-11	2.81e-10	KIRC	NYAP2	2	226447071	226447072	-	-	C	->C
KIRC-broad.mit.edu_GA_automated	plate_id	886	25	210	10	15	Inf	2.8e-11	2.81e-10	KIRC	OLFML3	1	114523958	114523959	-	-	C	->C
KIRC-broad.mit.edu_GA_automated	plate_id	886	25	210	10	15	Inf	2.8e-11	2.81e-10	KIRC	OSBPL3	7	24854824	24854824	T	T	A	T>A
KIRC-broad.mit.edu_GA_automated	plate_id	886	25	210	10	15	Inf	2.8e-11	2.81e-10	KIRC	PAMR1	11	35513669	35513670	-	-	C	->C
KIRC-broad.mit.edu_GA_automated	plate_id	886	25	210	10	15	Inf	2.8e-11	2.81e-10	KIRC	PAPPA2	1	176762723	176762724	-	-	C	->C
KIRC-broad.mit.edu_GA_automated	plate_id	886	25	210	10	15	Inf	2.8e-11	2.81e-10	KIRC	PKD2	4	88967931	88967931	A	A	T	A>T
KIRC-broad.mit.edu_GA_automated	plate_id	886	25	210	10	15	Inf	2.8e-11	2.81e-10	KIRC	PLSCR3	17	7294058	7294059	-	-	C	->C
KIRC-broad.mit.edu_GA_automated	plate_id	886	25	210	10	15	Inf	2.8e-11	2.81e-10	KIRC	RAB11FIP4	17	29758897	29758898	-	-	G	->G
KIRC-broad.mit.edu_GA_automated	plate_id	886	25	210	10	15	Inf	2.8e-11	2.81e-10	KIRC	SAMD7	3	169646267	169646268	-	-	G	->G
KIRC-broad.mit.edu_GA_automated	plate_id	886	25	210	10	15	Inf	2.8e-11	2.81e-10	KIRC	SLC22A5	5	131722730	131722731	-	-	C	->C
KIRC-broad.mit.edu_GA_automated	plate_id	886	25	210	10	15	Inf	2.8e-11	2.81e-10	KIRC	SREBF2	22	42271636	42271637	-	-	C	->C
KIRC-broad.mit.edu_GA_automated	plate_id	886	25	210	10	15	Inf	2.8e-11	2.81e-10	KIRC	SRGAP3	3	9034599	9034600	-	-	C	->C
KIRC-broad.mit.edu_GA_automated	plate_id	886	25	210	10	15	Inf	2.8e-11	2.81e-10	KIRC	SSH2	17	27959374	27959375	-	-	G	->G
KIRC-broad.mit.edu_GA_automated	plate_id	886	25	210	10	15	Inf	2.8e-11	2.81e-10	KIRC	SSH2	17	27963294	27963295	-	-	G	->G
KIRC-broad.mit.edu_GA_automated	plate_id	886	25	210	10	15	Inf	2.8e-11	2.81e-10	KIRC	TFE3	X	48887951	48887952	-	-	C	->C
KIRC-broad.mit.edu_GA_automated	plate_id	886	25	210	10	15	Inf	2.8e-11	2.81e-10	KIRC	TOPORS	9	32541886	32541886	A	A	T	A>T
KIRC-broad.mit.edu_GA_automated	plate_id	886	25	210	10	15	Inf	2.8e-11	2.81e-10	KIRC	TRPV5	7	142612493	142612494	-	-	C	->C
KIRC-broad.mit.edu_GA_automated	plate_id	886	25	210	10	15	Inf	2.8e-11	2.81e-10	KIRC	TSHZ3	19	31769061	31769062	-	-	C	->C
KIRC-broad.mit.edu_GA_automated	plate_id	886	25	210	10	15	Inf	2.8e-11	2.81e-10	KIRC	TSKS	19	50243087	50243088	-	-	C	->C
KIRC-broad.mit.edu_GA_automated	plate_id	886	25	210	10	15	Inf	2.8e-11	2.81e-10	KIRC	ZMYND12	1	42898878	42898879	-	-	G	->G
LGG-broad.mit.edu_GA_automated	plate_id	A289	24	506	9	15	96.1675	3.13e-11	7.2e-09	LGG	KAT6A	8	41790659	41790659	T	T	G	T>G
UCEC-broad.mit.edu_GA	plate_id	A10C	7	187	6	1	Inf	1.02e-10	1.74e-08	UCEC	IL2RG	X	70327613	70327614	-	-	G	->G
UCEC-broad.mit.edu_GA	plate_id	A10C	7	187	6	1	Inf	1.02e-10	1.74e-08	UCEC	RALGAPB	20	37146232	37146233	-	-	C	->C
UCEC-broad.mit.edu_GA	plate_id	A10C	7	187	6	1	Inf	1.02e-10	1.74e-08	UCEC	SORBS2	4	186515043	186515044	-	-	C	->C
UCEC-broad.mit.edu_GA	plate_id	A10C	7	187	6	1	Inf	1.02e-10	1.74e-08	UCEC	SSX9	X	48159107	48159108	-	-	G	->G
UCEC-broad.mit.edu_GA	plate_id	A10C	7	187	6	1	Inf	1.02e-10	1.74e-08	UCEC	TRUB1	10	116730191	116730192	-	-	C	->C
LUAD-broad.mit.edu_GA	plate_id	928	19	519	7	12	283.307	1.59e-10	1.46e-09	LUAD	ATP2B4	1	203667345	203667346	-	-	C	->C
LUAD-broad.mit.edu_GA	plate_id	928	19	519	7	12	283.307	1.59e-10	1.46e-09	LUAD	C1S	12	7171652	7171653	-	-	C	->C
LUAD-broad.mit.edu_GA	plate_id	928	19	519	7	12	283.307	1.59e-10	1.46e-09	LUAD	CPN1	10	101816832	101816833	-	-	G	->G
LUAD-broad.mit.edu_GA	plate_id	928	19	519	7	12	283.307	1.59e-10	1.46e-09	LUAD	GOLT1A	1	204170835	204170836	-	-	C	->C
LUAD-broad.mit.edu_GA	plate_id	928	19	519	7	12	283.307	1.59e-10	1.46e-09	LUAD	IKZF4	12	56429092	56429093	-	-	G	->G
LUAD-broad.mit.edu_GA	plate_id	928	19	519	7	12	283.307	1.59e-10	1.46e-09	LUAD	SLC43A3	11	57185234	57185235	-	-	G	->G
LUAD-broad.mit.edu_GA	plate_id	928	19	519	8	11	89.4533	2.1e-10	1.91e-09	LUAD	EEF1B2	2	207025358	207025358	A	A	G	A>G
KIRC-broad.mit.edu_GA_automated	plate_id	886	25	210	9	16	Inf	3.96e-10	3.36e-09	KIRC	ARHGEF40	14	21546603	21546604	-	-	G	->G
KIRC-broad.mit.edu_GA_automated	plate_id	886	25	210	9	16	Inf	3.96e-10	3.36e-09	KIRC	BAG6	6	31608570	31608571	-	-	G	->G
KIRC-broad.mit.edu_GA_automated	plate_id	886	25	210	9	16	Inf	3.96e-10	3.36e-09	KIRC	CCDC153	11	119061042	119061043	-	-	G	->G
KIRC-broad.mit.edu_GA_automated	plate_id	886	25	210	9	16	Inf	3.96e-10	3.36e-09	KIRC	DCAF17	2	172314880	172314880	A	A	T	A>T
KIRC-broad.mit.edu_GA_automated	plate_id	886	25	210	9	16	Inf	3.96e-10	3.36e-09	KIRC	EXOC2	6	637793	637794	-	-	G	->G
KIRC-broad.mit.edu_GA_automated	plate_id	886	25	210	9	16	Inf	3.96e-10	3.36e-09	KIRC	FBL	19	40325192	40325193	-	-	G	->G
KIRC-broad.mit.edu_GA_automated	plate_id	886	25	210	9	16	Inf	3.96e-10	3.36e-09	KIRC	FGG	4	155526058	155526059	-	-	C	->C
KIRC-broad.mit.edu_GA_automated	plate_id	886	25	210	9	16	Inf	3.96e-10	3.36e-09	KIRC	FRAS1	4	79238582	79238583	-	-	C	->C
KIRC-broad.mit.edu_GA_automated	plate_id	886	25	210	9	16	Inf	3.96e-10	3.36e-09	KIRC	FTSJ3	17	61897195	61897195	A	A	T	A>T
KIRC-broad.mit.edu_GA_automated	plate_id	886	25	210	9	16	Inf	3.96e-10	3.36e-09	KIRC	FYB	5	39202090	39202091	-	-	C	->C
KIRC-broad.mit.edu_GA_automated	plate_id	886	25	210	9	16	Inf	3.96e-10	3.36e-09	KIRC	HECTD4	12	112600859	112600860	-	-	G	->G
KIRC-broad.mit.edu_GA_automated	plate_id	886	25	210	9	16	Inf	3.96e-10	3.36e-09	KIRC	HPGDS	4	95223320	95223321	-	-	C	->C
KIRC-broad.mit.edu_GA_automated	plate_id	886	25	210	9	16	Inf	3.96e-10	3.36e-09	KIRC	JAK1	1	65325832	65325833	-	-	G	->G
KIRC-broad.mit.edu_GA_automated	plate_id	886	25	210	9	16	Inf	3.96e-10	3.36e-09	KIRC	KCNB1	20	47989771	47989772	-	-	G	->G
KIRC-broad.mit.edu_GA_automated	plate_id	886	25	210	9	16	Inf	3.96e-10	3.36e-09	KIRC	KMT2D	12	49445525	49445526	-	-	G	->G
KIRC-broad.mit.edu_GA_automated	plate_id	886	25	210	9	16	Inf	3.96e-10	3.36e-09	KIRC	LRP4	11	46880747	46880748	-	-	C	->C
KIRC-broad.mit.edu_GA_automated	plate_id	886	25	210	9	16	Inf	3.96e-10	3.36e-09	KIRC	2016-03-10	17	60814265	60814266	-	-	C	->C
KIRC-broad.mit.edu_GA_automated	plate_id	886	25	210	9	16	Inf	3.96e-10	3.36e-09	KIRC	MOCS2	5	52402939	52402940	-	-	G	->G
KIRC-broad.mit.edu_GA_automated	plate_id	886	25	210	9	16	Inf	3.96e-10	3.36e-09	KIRC	MYOM2	8	2088682	2088683	-	-	G	->G
KIRC-broad.mit.edu_GA_automated	plate_id	886	25	210	9	16	Inf	3.96e-10	3.36e-09	KIRC	NCAPD3	11	134048585	134048586	-	-	G	->G
KIRC-broad.mit.edu_GA_automated	plate_id	886	25	210	9	16	Inf	3.96e-10	3.36e-09	KIRC	NUMA1	11	71746964	71746965	-	-	C	->C
KIRC-broad.mit.edu_GA_automated	plate_id	886	25	210	9	16	Inf	3.96e-10	3.36e-09	KIRC	PDZD2	5	31799656	31799657	-	-	G	->G
KIRC-broad.mit.edu_GA_automated	plate_id	886	25	210	9	16	Inf	3.96e-10	3.36e-09	KIRC	PHYH	10	13325834	13325835	-	-	C	->C
KIRC-broad.mit.edu_GA_automated	plate_id	886	25	210	9	16	Inf	3.96e-10	3.36e-09	KIRC	PIK3C2B	1	204438071	204438072	-	-	G	->G
KIRC-broad.mit.edu_GA_automated	plate_id	886	25	210	9	16	Inf	3.96e-10	3.36e-09	KIRC	POLE	12	133245023	133245024	-	-	G	->G
KIRC-broad.mit.edu_GA_automated	plate_id	886	25	210	9	16	Inf	3.96e-10	3.36e-09	KIRC	POU2F2	19	42621520	42621521	-	-	G	->G
KIRC-broad.mit.edu_GA_automated	plate_id	886	25	210	9	16	Inf	3.96e-10	3.36e-09	KIRC	RFX5	1	151318740	151318741	-	-	G	->G
KIRC-broad.mit.edu_GA_automated	plate_id	886	25	210	9	16	Inf	3.96e-10	3.36e-09	KIRC	RPA1	17	1782982	1782983	-	-	G	->G
KIRC-broad.mit.edu_GA_automated	plate_id	886	25	210	9	16	Inf	3.96e-10	3.36e-09	KIRC	SDHAF2	11	61205474	61205474	A	A	T	A>T
KIRC-broad.mit.edu_GA_automated	plate_id	886	25	210	9	16	Inf	3.96e-10	3.36e-09	KIRC	SEC31B	10	102265153	102265154	-	-	G	->G
KIRC-broad.mit.edu_GA_automated	plate_id	886	25	210	9	16	Inf	3.96e-10	3.36e-09	KIRC	SLC26A4	7	107315388	107315388	A	A	T	A>T
KIRC-broad.mit.edu_GA_automated	plate_id	886	25	210	9	16	Inf	3.96e-10	3.36e-09	KIRC	VPS13D	1	12422832	12422833	-	-	C	->C
KIRC-broad.mit.edu_GA_automated	plate_id	886	25	210	9	16	Inf	3.96e-10	3.36e-09	KIRC	WBP11	12	14940365	14940366	-	-	G	->G
KIRC-broad.mit.edu_GA_automated	plate_id	886	25	210	9	16	Inf	3.96e-10	3.36e-09	KIRC	ZFP64	20	50769075	50769076	-	-	G	->G
KIRC-broad.mit.edu_GA_automated	plate_id	886	25	210	9	16	Inf	3.96e-10	3.36e-09	KIRC	ZNF462	9	109691601	109691602	-	-	G	->G
COAD-hgsc.bcm.edu_GA	plate_id	1719	47	172	13	34	Inf	4.73e-10	1.01e-06	COAD	FIGNL2	12	52215102	52215102	T	T	G	T>G
LUAD-broad.mit.edu_GA	plate_id	928	19	519	7	12	142.758	7e-10	5.58e-09	LUAD	APIP	11	34904908	34904909	-	-	C	->C
UCEC-broad.mit.edu_GA	plate_id	A10C	7	187	6	1	699.652	7.12e-10	1.01e-07	UCEC	FGF13	X	137939822	137939823	-	-	G	->G
LUAD-broad.mit.edu_GA	plate_id	928	19	519	6	13	Inf	8.28e-10	5.58e-09	LUAD	ABCC5	3	183700629	183700630	-	-	C	->C
LUAD-broad.mit.edu_GA	plate_id	928	19	519	6	13	Inf	8.28e-10	5.58e-09	LUAD	ABCG2	4	89052270	89052271	-	-	T	->T
LUAD-broad.mit.edu_GA	plate_id	928	19	519	6	13	Inf	8.28e-10	5.58e-09	LUAD	ANK2	4	114280134	114280135	-	-	G	->G
LUAD-broad.mit.edu_GA	plate_id	928	19	519	6	13	Inf	8.28e-10	5.58e-09	LUAD	ANP32AP1	15	35529756	35529757	-	-	G	->G
LUAD-broad.mit.edu_GA	plate_id	928	19	519	6	13	Inf	8.28e-10	5.58e-09	LUAD	ARAP3	5	141049341	141049342	-	-	C	->C
LUAD-broad.mit.edu_GA	plate_id	928	19	519	6	13	Inf	8.28e-10	5.58e-09	LUAD	ARHGAP26	5	142586762	142586763	-	-	C	->C
LUAD-broad.mit.edu_GA	plate_id	928	19	519	6	13	Inf	8.28e-10	5.58e-09	LUAD	AXL	19	41743932	41743933	-	-	C	->C
LUAD-broad.mit.edu_GA	plate_id	928	19	519	6	13	Inf	8.28e-10	5.58e-09	LUAD	BEST3	12	70049361	70049362	-	-	G	->G
LUAD-broad.mit.edu_GA	plate_id	928	19	519	6	13	Inf	8.28e-10	5.58e-09	LUAD	C6	5	41159256	41159257	-	-	G	->G
LUAD-broad.mit.edu_GA	plate_id	928	19	519	6	13	Inf	8.28e-10	5.58e-09	LUAD	C7orf10	7	40899961	40899962	-	-	C	->C
LUAD-broad.mit.edu_GA	plate_id	928	19	519	6	13	Inf	8.28e-10	5.58e-09	LUAD	CSF3R	1	36935322	36935323	-	-	G	->G
LUAD-broad.mit.edu_GA	plate_id	928	19	519	6	13	Inf	8.28e-10	5.58e-09	LUAD	CTAGE7P	10	131905959	131905960	-	-	G	->G
LUAD-broad.mit.edu_GA	plate_id	928	19	519	6	13	Inf	8.28e-10	5.58e-09	LUAD	DDX17	22	38895454	38895455	-	-	C	->C
LUAD-broad.mit.edu_GA	plate_id	928	19	519	6	13	Inf	8.28e-10	5.58e-09	LUAD	DGKA	12	56347513	56347514	-	-	C	->C
LUAD-broad.mit.edu_GA	plate_id	928	19	519	6	13	Inf	8.28e-10	5.58e-09	LUAD	DPYSL2	8	26513183	26513184	-	-	C	->C
LUAD-broad.mit.edu_GA	plate_id	928	19	519	6	13	Inf	8.28e-10	5.58e-09	LUAD	EP400	12	132466645	132466646	-	-	C	->C
LUAD-broad.mit.edu_GA	plate_id	928	19	519	6	13	Inf	8.28e-10	5.58e-09	LUAD	FGG	4	155526058	155526059	-	-	C	->C
LUAD-broad.mit.edu_GA	plate_id	928	19	519	6	13	Inf	8.28e-10	5.58e-09	LUAD	FRAS1	4	79238582	79238583	-	-	C	->C
LUAD-broad.mit.edu_GA	plate_id	928	19	519	6	13	Inf	8.28e-10	5.58e-09	LUAD	FYB	5	39202090	39202091	-	-	C	->C
LUAD-broad.mit.edu_GA	plate_id	928	19	519	6	13	Inf	8.28e-10	5.58e-09	LUAD	HNF1B	17	36059173	36059174	-	-	G	->G
LUAD-broad.mit.edu_GA	plate_id	928	19	519	6	13	Inf	8.28e-10	5.58e-09	LUAD	HTR1E	6	87725846	87725847	-	-	C	->C
LUAD-broad.mit.edu_GA	plate_id	928	19	519	6	13	Inf	8.28e-10	5.58e-09	LUAD	IGF1R	15	99251108	99251109	-	-	G	->G
LUAD-broad.mit.edu_GA	plate_id	928	19	519	6	13	Inf	8.28e-10	5.58e-09	LUAD	KIAA1609	16	84514302	84514303	-	-	C	->C
LUAD-broad.mit.edu_GA	plate_id	928	19	519	6	13	Inf	8.28e-10	5.58e-09	LUAD	KIF13A	6	17837307	17837308	-	-	C	->C
LUAD-broad.mit.edu_GA	plate_id	928	19	519	6	13	Inf	8.28e-10	5.58e-09	LUAD	KLHDC5	12	27950768	27950769	-	-	G	->G
LUAD-broad.mit.edu_GA	plate_id	928	19	519	6	13	Inf	8.28e-10	5.58e-09	LUAD	MARK1	1	220835506	220835506	T	T	G	T>G
LUAD-broad.mit.edu_GA	plate_id	928	19	519	6	13	Inf	8.28e-10	5.58e-09	LUAD	MIR1208	8	129162432	129162433	-	-	G	->G
LUAD-broad.mit.edu_GA	plate_id	928	19	519	6	13	Inf	8.28e-10	5.58e-09	LUAD	MLL2	12	49445525	49445526	-	-	G	->G
LUAD-broad.mit.edu_GA	plate_id	928	19	519	6	13	Inf	8.28e-10	5.58e-09	LUAD	MUC16	19	9064309	9064310	-	-	G	->G
LUAD-broad.mit.edu_GA	plate_id	928	19	519	6	13	Inf	8.28e-10	5.58e-09	LUAD	NYAP2	2	226447071	226447072	-	-	C	->C
LUAD-broad.mit.edu_GA	plate_id	928	19	519	6	13	Inf	8.28e-10	5.58e-09	LUAD	OR10Z1	1	158577072	158577073	-	-	C	->C
LUAD-broad.mit.edu_GA	plate_id	928	19	519	6	13	Inf	8.28e-10	5.58e-09	LUAD	PDE1B	12	54971059	54971060	-	-	C	->C
LUAD-broad.mit.edu_GA	plate_id	928	19	519	6	13	Inf	8.28e-10	5.58e-09	LUAD	PGLYRP4	1	153317810	153317811	-	-	C	->C
LUAD-broad.mit.edu_GA	plate_id	928	19	519	6	13	Inf	8.28e-10	5.58e-09	LUAD	PPP1R10	6	30569333	30569334	-	-	G	->G
LUAD-broad.mit.edu_GA	plate_id	928	19	519	6	13	Inf	8.28e-10	5.58e-09	LUAD	REV3L	6	111693903	111693904	-	-	G	->G
LUAD-broad.mit.edu_GA	plate_id	928	19	519	6	13	Inf	8.28e-10	5.58e-09	LUAD	RPA1	17	1782982	1782983	-	-	G	->G
LUAD-broad.mit.edu_GA	plate_id	928	19	519	6	13	Inf	8.28e-10	5.58e-09	LUAD	SIPA1L1	14	72165808	72165809	-	-	G	->G
LUAD-broad.mit.edu_GA	plate_id	928	19	519	6	13	Inf	8.28e-10	5.58e-09	LUAD	SLC24A6	12	113758305	113758306	-	-	G	->G
LUAD-broad.mit.edu_GA	plate_id	928	19	519	6	13	Inf	8.28e-10	5.58e-09	LUAD	SPDYE3	7	99912173	99912174	-	-	C	->C
LUAD-broad.mit.edu_GA	plate_id	928	19	519	6	13	Inf	8.28e-10	5.58e-09	LUAD	STK10	5	171517344	171517345	-	-	T	->T
LUAD-broad.mit.edu_GA	plate_id	928	19	519	6	13	Inf	8.28e-10	5.58e-09	LUAD	TARS2	1	150477198	150477199	-	-	G	->G
LUAD-broad.mit.edu_GA	plate_id	928	19	519	6	13	Inf	8.28e-10	5.58e-09	LUAD	TEP1	14	20852646	20852647	-	-	C	->C
LUAD-broad.mit.edu_GA	plate_id	928	19	519	6	13	Inf	8.28e-10	5.58e-09	LUAD	TMEM81	1	205052693	205052694	-	-	C	->C
LUAD-broad.mit.edu_GA	plate_id	928	19	519	6	13	Inf	8.28e-10	5.58e-09	LUAD	TMX2	11	57505845	57505846	-	-	C	->C
LUAD-broad.mit.edu_GA	plate_id	928	19	519	6	13	Inf	8.28e-10	5.58e-09	LUAD	TNC	9	117797538	117797539	-	-	G	->G
LUAD-broad.mit.edu_GA	plate_id	928	19	519	6	13	Inf	8.28e-10	5.58e-09	LUAD	TSHZ3	19	31769141	31769142	-	-	C	->C
LUAD-broad.mit.edu_GA	plate_id	928	19	519	6	13	Inf	8.28e-10	5.58e-09	LUAD	UNC5C	4	96091356	96091357	-	-	G	->G
LUAD-broad.mit.edu_GA	plate_id	928	19	519	6	13	Inf	8.28e-10	5.58e-09	LUAD	VGLL3	3	87018182	87018183	-	-	C	->C
KIRC-broad.mit.edu_GA_automated	plate_id	886	25	210	8	17	Inf	5.29e-09	3.5e-08	KIRC	ACIN1	14	23549377	23549378	-	-	G	->G
KIRC-broad.mit.edu_GA_automated	plate_id	886	25	210	8	17	Inf	5.29e-09	3.5e-08	KIRC	ADAM23	2	207460860	207460861	-	-	C	->C
KIRC-broad.mit.edu_GA_automated	plate_id	886	25	210	8	17	Inf	5.29e-09	3.5e-08	KIRC	C1S	12	7172402	7172402	A	A	T	A>T
KIRC-broad.mit.edu_GA_automated	plate_id	886	25	210	8	17	Inf	5.29e-09	3.5e-08	KIRC	CAMTA2	17	4884523	4884524	-	-	C	->C
KIRC-broad.mit.edu_GA_automated	plate_id	886	25	210	8	17	Inf	5.29e-09	3.5e-08	KIRC	CD300LG	17	41931337	41931338	-	-	C	->C
KIRC-broad.mit.edu_GA_automated	plate_id	886	25	210	8	17	Inf	5.29e-09	3.5e-08	KIRC	CDHR1	10	85972096	85972097	-	-	C	->C
KIRC-broad.mit.edu_GA_automated	plate_id	886	25	210	8	17	Inf	5.29e-09	3.5e-08	KIRC	CHD3	17	7798764	7798765	-	-	C	->C
KIRC-broad.mit.edu_GA_automated	plate_id	886	25	210	8	17	Inf	5.29e-09	3.5e-08	KIRC	CLASRP	19	45556128	45556129	-	-	C	->C
KIRC-broad.mit.edu_GA_automated	plate_id	886	25	210	8	17	Inf	5.29e-09	3.5e-08	KIRC	CNBD2	20	34618503	34618504	-	-	C	->C
KIRC-broad.mit.edu_GA_automated	plate_id	886	25	210	8	17	Inf	5.29e-09	3.5e-08	KIRC	CNOT3	19	54649666	54649667	-	-	C	->C
KIRC-broad.mit.edu_GA_automated	plate_id	886	25	210	8	17	Inf	5.29e-09	3.5e-08	KIRC	CPAMD8	19	17039883	17039884	-	-	C	->C
KIRC-broad.mit.edu_GA_automated	plate_id	886	25	210	8	17	Inf	5.29e-09	3.5e-08	KIRC	DCHS1	11	6662141	6662142	-	-	G	->G
KIRC-broad.mit.edu_GA_automated	plate_id	886	25	210	8	17	Inf	5.29e-09	3.5e-08	KIRC	DDB1	11	61093159	61093160	-	-	C	->C
KIRC-broad.mit.edu_GA_automated	plate_id	886	25	210	8	17	Inf	5.29e-09	3.5e-08	KIRC	DIEXF	1	210014266	210014267	-	-	C	->C
KIRC-broad.mit.edu_GA_automated	plate_id	886	25	210	8	17	Inf	5.29e-09	3.5e-08	KIRC	DNAH3	16	20966297	20966298	-	-	G	->G
KIRC-broad.mit.edu_GA_automated	plate_id	886	25	210	8	17	Inf	5.29e-09	3.5e-08	KIRC	EDAR	2	109539836	109539837	-	-	G	->G
KIRC-broad.mit.edu_GA_automated	plate_id	886	25	210	8	17	Inf	5.29e-09	3.5e-08	KIRC	EGR1	5	137803131	137803132	-	-	C	->C
KIRC-broad.mit.edu_GA_automated	plate_id	886	25	210	8	17	Inf	5.29e-09	3.5e-08	KIRC	EIF4G2	11	10820934	10820935	-	-	G	->G
KIRC-broad.mit.edu_GA_automated	plate_id	886	25	210	8	17	Inf	5.29e-09	3.5e-08	KIRC	FAT1	4	187558038	187558039	-	-	G	->G
KIRC-broad.mit.edu_GA_automated	plate_id	886	25	210	8	17	Inf	5.29e-09	3.5e-08	KIRC	FREM1	9	14823286	14823287	-	-	G	->G
KIRC-broad.mit.edu_GA_automated	plate_id	886	25	210	8	17	Inf	5.29e-09	3.5e-08	KIRC	GPR32	19	51274914	51274915	-	-	C	->C
KIRC-broad.mit.edu_GA_automated	plate_id	886	25	210	8	17	Inf	5.29e-09	3.5e-08	KIRC	HAX1	1	154246356	154246357	-	-	G	->G
KIRC-broad.mit.edu_GA_automated	plate_id	886	25	210	8	17	Inf	5.29e-09	3.5e-08	KIRC	HPS3	3	148872892	148872892	A	A	T	A>T
KIRC-broad.mit.edu_GA_automated	plate_id	886	25	210	8	17	Inf	5.29e-09	3.5e-08	KIRC	IL2RG	X	70327613	70327614	-	-	G	->G
KIRC-broad.mit.edu_GA_automated	plate_id	886	25	210	8	17	Inf	5.29e-09	3.5e-08	KIRC	KCNH4	17	40328258	40328259	-	-	C	->C
KIRC-broad.mit.edu_GA_automated	plate_id	886	25	210	8	17	Inf	5.29e-09	3.5e-08	KIRC	KIF5A	12	57972047	57972048	-	-	G	->G
KIRC-broad.mit.edu_GA_automated	plate_id	886	25	210	8	17	Inf	5.29e-09	3.5e-08	KIRC	LGI2	4	25005320	25005321	-	-	C	->C
KIRC-broad.mit.edu_GA_automated	plate_id	886	25	210	8	17	Inf	5.29e-09	3.5e-08	KIRC	LRRC8C	1	90179646	90179647	-	-	C	->C
KIRC-broad.mit.edu_GA_automated	plate_id	886	25	210	8	17	Inf	5.29e-09	3.5e-08	KIRC	LUZP1	1	23417944	23417945	-	-	G	->G
KIRC-broad.mit.edu_GA_automated	plate_id	886	25	210	8	17	Inf	5.29e-09	3.5e-08	KIRC	MARK4	19	45805663	45805664	-	-	C	->C
KIRC-broad.mit.edu_GA_automated	plate_id	886	25	210	8	17	Inf	5.29e-09	3.5e-08	KIRC	MED6	14	71051554	71051555	-	-	G	->G
KIRC-broad.mit.edu_GA_automated	plate_id	886	25	210	8	17	Inf	5.29e-09	3.5e-08	KIRC	MPV17L2	19	18305818	18305819	-	-	C	->C
KIRC-broad.mit.edu_GA_automated	plate_id	886	25	210	8	17	Inf	5.29e-09	3.5e-08	KIRC	MRPL50	9	104152774	104152775	-	-	G	->G
KIRC-broad.mit.edu_GA_automated	plate_id	886	25	210	8	17	Inf	5.29e-09	3.5e-08	KIRC	NKD1	16	50667134	50667135	-	-	C	->C
KIRC-broad.mit.edu_GA_automated	plate_id	886	25	210	8	17	Inf	5.29e-09	3.5e-08	KIRC	NRSN1	6	24145844	24145845	-	-	C	->C
KIRC-broad.mit.edu_GA_automated	plate_id	886	25	210	8	17	Inf	5.29e-09	3.5e-08	KIRC	P2RX6P	22	21399220	21399221	-	-	C	->C
KIRC-broad.mit.edu_GA_automated	plate_id	886	25	210	8	17	Inf	5.29e-09	3.5e-08	KIRC	PAPPA2	1	176563963	176563964	-	-	G	->G
KIRC-broad.mit.edu_GA_automated	plate_id	886	25	210	8	17	Inf	5.29e-09	3.5e-08	KIRC	PAX6	11	31812316	31812317	-	-	G	->G
KIRC-broad.mit.edu_GA_automated	plate_id	886	25	210	8	17	Inf	5.29e-09	3.5e-08	KIRC	PDE9A	21	44171249	44171250	-	-	T	->T
KIRC-broad.mit.edu_GA_automated	plate_id	886	25	210	8	17	Inf	5.29e-09	3.5e-08	KIRC	PHACTR1	6	13185110	13185111	-	-	C	->C
KIRC-broad.mit.edu_GA_automated	plate_id	886	25	210	8	17	Inf	5.29e-09	3.5e-08	KIRC	PLOD3	7	100856125	100856126	-	-	C	->C
KIRC-broad.mit.edu_GA_automated	plate_id	886	25	210	8	17	Inf	5.29e-09	3.5e-08	KIRC	PREP	6	105800954	105800954	T	T	A	T>A
KIRC-broad.mit.edu_GA_automated	plate_id	886	25	210	8	17	Inf	5.29e-09	3.5e-08	KIRC	PSD3	8	18413784	18413785	-	-	G	->G
KIRC-broad.mit.edu_GA_automated	plate_id	886	25	210	8	17	Inf	5.29e-09	3.5e-08	KIRC	RDX	11	110104136	110104137	-	-	G	->G
KIRC-broad.mit.edu_GA_automated	plate_id	886	25	210	8	17	Inf	5.29e-09	3.5e-08	KIRC	RRAS2	11	14316410	14316410	T	T	A	T>A
KIRC-broad.mit.edu_GA_automated	plate_id	886	25	210	8	17	Inf	5.29e-09	3.5e-08	KIRC	RRN3P1	16	21814059	21814060	-	-	G	->G
KIRC-broad.mit.edu_GA_automated	plate_id	886	25	210	8	17	Inf	5.29e-09	3.5e-08	KIRC	RUFY4	2	218940309	218940310	-	-	G	->G
KIRC-broad.mit.edu_GA_automated	plate_id	886	25	210	8	17	Inf	5.29e-09	3.5e-08	KIRC	SALL4	20	50400982	50400983	-	-	C	->C
KIRC-broad.mit.edu_GA_automated	plate_id	886	25	210	8	17	Inf	5.29e-09	3.5e-08	KIRC	SEMA6A	5	115782764	115782765	-	-	G	->G
KIRC-broad.mit.edu_GA_automated	plate_id	886	25	210	8	17	Inf	5.29e-09	3.5e-08	KIRC	SIPA1L2	1	232650637	232650638	-	-	G	->G
KIRC-broad.mit.edu_GA_automated	plate_id	886	25	210	8	17	Inf	5.29e-09	3.5e-08	KIRC	SLC4A5	2	74480126	74480127	-	-	G	->G
KIRC-broad.mit.edu_GA_automated	plate_id	886	25	210	8	17	Inf	5.29e-09	3.5e-08	KIRC	SLC6A7	5	149581960	149581961	-	-	G	->G
KIRC-broad.mit.edu_GA_automated	plate_id	886	25	210	8	17	Inf	5.29e-09	3.5e-08	KIRC	SMOX	20	4163027	4163028	-	-	G	->G
KIRC-broad.mit.edu_GA_automated	plate_id	886	25	210	8	17	Inf	5.29e-09	3.5e-08	KIRC	SORD	15	45353365	45353366	-	-	C	->C
KIRC-broad.mit.edu_GA_automated	plate_id	886	25	210	8	17	Inf	5.29e-09	3.5e-08	KIRC	SPEN	1	16259479	16259480	-	-	C	->C
KIRC-broad.mit.edu_GA_automated	plate_id	886	25	210	8	17	Inf	5.29e-09	3.5e-08	KIRC	SPRY4	5	141694153	141694154	-	-	G	->G
KIRC-broad.mit.edu_GA_automated	plate_id	886	25	210	8	17	Inf	5.29e-09	3.5e-08	KIRC	SRRM2	16	2815060	2815061	-	-	C	->C
KIRC-broad.mit.edu_GA_automated	plate_id	886	25	210	8	17	Inf	5.29e-09	3.5e-08	KIRC	TCF7	5	133473764	133473765	-	-	C	->C
KIRC-broad.mit.edu_GA_automated	plate_id	886	25	210	8	17	Inf	5.29e-09	3.5e-08	KIRC	THOC5	22	29925230	29925231	-	-	G	->G
KIRC-broad.mit.edu_GA_automated	plate_id	886	25	210	8	17	Inf	5.29e-09	3.5e-08	KIRC	TNN	1	175096158	175096159	-	-	C	->C
KIRC-broad.mit.edu_GA_automated	plate_id	886	25	210	8	17	Inf	5.29e-09	3.5e-08	KIRC	TNRC6B	22	40681766	40681767	-	-	C	->C
KIRC-broad.mit.edu_GA_automated	plate_id	886	25	210	8	17	Inf	5.29e-09	3.5e-08	KIRC	TRH	3	129695642	129695643	-	-	G	->G
LUAD-broad.mit.edu_GA	plate_id	928	19	519	6	13	225.734	5.68e-09	3.81e-08	LUAD	KCNB2	8	73480091	73480092	-	-	G	->G
BRCA-genome.wustl.edu_GA	plate_id	A188	9	767	4	5	Inf	8.4e-09	3.25e-06	BRCA	DSPP	4	88537249	88537249	T	T	C	T>C
KIRC-broad.mit.edu_GA_automated	plate_id	966	27	208	9	18	99.0794	8.43e-09	5.57e-08	KIRC	EMG1	12	7080212	7080213	-	-	C	->C
UCEC-broad.mit.edu_GA	plate_id	A10C	7	187	5	2	Inf	9.66e-09	3.57e-07	UCEC	ADGB	6	147042626	147042627	-	-	G	->G
UCEC-broad.mit.edu_GA	plate_id	A10C	7	187	5	2	Inf	9.66e-09	3.57e-07	UCEC	ALS2	2	202588159	202588160	-	-	C	->C
UCEC-broad.mit.edu_GA	plate_id	A10C	7	187	5	2	Inf	9.66e-09	3.57e-07	UCEC	ATP2B4	1	203667345	203667346	-	-	C	->C
UCEC-broad.mit.edu_GA	plate_id	A10C	7	187	5	2	Inf	9.66e-09	3.57e-07	UCEC	CCDC168	13	103385579	103385580	-	-	G	->G
UCEC-broad.mit.edu_GA	plate_id	A10C	7	187	5	2	Inf	9.66e-09	3.57e-07	UCEC	DCDC2	6	24205282	24205283	-	-	C	->C
UCEC-broad.mit.edu_GA	plate_id	A10C	7	187	5	2	Inf	9.66e-09	3.57e-07	UCEC	FAM104A	17	71223356	71223357	-	-	G	->G
UCEC-broad.mit.edu_GA	plate_id	A10C	7	187	5	2	Inf	9.66e-09	3.57e-07	UCEC	KBTBD6	13	41705321	41705322	-	-	C	->C
UCEC-broad.mit.edu_GA	plate_id	A10C	7	187	5	2	Inf	9.66e-09	3.57e-07	UCEC	KIAA1731	11	93433116	93433117	-	-	C	->C
UCEC-broad.mit.edu_GA	plate_id	A10C	7	187	5	2	Inf	9.66e-09	3.57e-07	UCEC	MRPS31	13	41340958	41340959	-	-	G	->G
UCEC-broad.mit.edu_GA	plate_id	A10C	7	187	5	2	Inf	9.66e-09	3.57e-07	UCEC	MYO3B	2	171240258	171240259	-	-	C	->C
UCEC-broad.mit.edu_GA	plate_id	A10C	7	187	5	2	Inf	9.66e-09	3.57e-07	UCEC	OVGP1	1	111959046	111959047	-	-	C	->C
UCEC-broad.mit.edu_GA	plate_id	A10C	7	187	5	2	Inf	9.66e-09	3.57e-07	UCEC	PDS5B	13	33306277	33306278	-	-	C	->C
UCEC-broad.mit.edu_GA	plate_id	A10C	7	187	5	2	Inf	9.66e-09	3.57e-07	UCEC	RDX	11	110104136	110104137	-	-	G	->G
UCEC-broad.mit.edu_GA	plate_id	A10C	7	187	5	2	Inf	9.66e-09	3.57e-07	UCEC	SSX3	X	48209462	48209463	-	-	G	->G
UCEC-broad.mit.edu_GA	plate_id	A10C	7	187	5	2	Inf	9.66e-09	3.57e-07	UCEC	TLR3	4	186997804	186997805	-	-	G	->G
UCEC-broad.mit.edu_GA	plate_id	A10C	7	187	5	2	Inf	9.66e-09	3.57e-07	UCEC	TRIP12	2	230724115	230724116	-	-	T	->T
UCEC-broad.mit.edu_GA	plate_id	A10C	7	187	5	2	Inf	9.66e-09	3.57e-07	UCEC	TULP4	6	158900956	158900957	-	-	C	->C
LUAD-broad.mit.edu_GA	plate_id	969	9	529	7	2	85.8757	1.2e-08	8.01e-08	LUAD	IL32	16	3119304	3119305	-	-	G	->G
LUAD-broad.mit.edu_GA	plate_id	928	19	519	5	14	Inf	3.15e-08	1.67e-07	LUAD	ADCY10	1	167865905	167865906	-	-	G	->G
LUAD-broad.mit.edu_GA	plate_id	928	19	519	5	14	Inf	3.15e-08	1.67e-07	LUAD	ASH1L	1	155491185	155491186	-	-	T	->T
LUAD-broad.mit.edu_GA	plate_id	928	19	519	5	14	Inf	3.15e-08	1.67e-07	LUAD	BCORL1	X	129146962	129146963	-	-	G	->G
LUAD-broad.mit.edu_GA	plate_id	928	19	519	5	14	Inf	3.15e-08	1.67e-07	LUAD	BSCL2	11	62458782	62458783	-	-	C	->C
LUAD-broad.mit.edu_GA	plate_id	928	19	519	5	14	Inf	3.15e-08	1.67e-07	LUAD	CPEB2	4	15067857	15067858	-	-	T	->T
LUAD-broad.mit.edu_GA	plate_id	928	19	519	5	14	Inf	3.15e-08	1.67e-07	LUAD	CPSF7	11	61183884	61183885	-	-	G	->G
LUAD-broad.mit.edu_GA	plate_id	928	19	519	5	14	Inf	3.15e-08	1.67e-07	LUAD	CUBN	10	16877089	16877090	-	-	G	->G
LUAD-broad.mit.edu_GA	plate_id	928	19	519	5	14	Inf	3.15e-08	1.67e-07	LUAD	EDAR	2	109539836	109539837	-	-	G	->G
LUAD-broad.mit.edu_GA	plate_id	928	19	519	5	14	Inf	3.15e-08	1.67e-07	LUAD	EGFLAM	5	38407191	38407192	-	-	G	->G
LUAD-broad.mit.edu_GA	plate_id	928	19	519	5	14	Inf	3.15e-08	1.67e-07	LUAD	FAM212B	1	112269924	112269925	-	-	C	->C
LUAD-broad.mit.edu_GA	plate_id	928	19	519	5	14	Inf	3.15e-08	1.67e-07	LUAD	FANCE	6	35425714	35425715	-	-	C	->C
LUAD-broad.mit.edu_GA	plate_id	928	19	519	5	14	Inf	3.15e-08	1.67e-07	LUAD	FIGN	2	164467542	164467543	-	-	C	->C
LUAD-broad.mit.edu_GA	plate_id	928	19	519	5	14	Inf	3.15e-08	1.67e-07	LUAD	FNDC3B	3	172096209	172096210	-	-	C	->C
LUAD-broad.mit.edu_GA	plate_id	928	19	519	5	14	Inf	3.15e-08	1.67e-07	LUAD	GAB1	4	144381536	144381537	-	-	C	->C
LUAD-broad.mit.edu_GA	plate_id	928	19	519	5	14	Inf	3.15e-08	1.67e-07	LUAD	GPR112	X	135455155	135455156	-	-	G	->G
LUAD-broad.mit.edu_GA	plate_id	928	19	519	5	14	Inf	3.15e-08	1.67e-07	LUAD	GRM3	7	86415681	86415682	-	-	C	->C
LUAD-broad.mit.edu_GA	plate_id	928	19	519	5	14	Inf	3.15e-08	1.67e-07	LUAD	IQCC	1	32673442	32673443	-	-	G	->G
LUAD-broad.mit.edu_GA	plate_id	928	19	519	5	14	Inf	3.15e-08	1.67e-07	LUAD	KDM5A	12	442810	442811	-	-	C	->C
LUAD-broad.mit.edu_GA	plate_id	928	19	519	5	14	Inf	3.15e-08	1.67e-07	LUAD	KIAA0913	10	75560463	75560464	-	-	C	->C
LUAD-broad.mit.edu_GA	plate_id	928	19	519	5	14	Inf	3.15e-08	1.67e-07	LUAD	KIRREL	1	158058202	158058203	-	-	C	->C
LUAD-broad.mit.edu_GA	plate_id	928	19	519	5	14	Inf	3.15e-08	1.67e-07	LUAD	LARS	5	145523013	145523014	-	-	C	->C
LUAD-broad.mit.edu_GA	plate_id	928	19	519	5	14	Inf	3.15e-08	1.67e-07	LUAD	LGI1	10	95552601	95552602	-	-	C	->C
LUAD-broad.mit.edu_GA	plate_id	928	19	519	5	14	Inf	3.15e-08	1.67e-07	LUAD	LUZP1	1	23417944	23417945	-	-	G	->G
LUAD-broad.mit.edu_GA	plate_id	928	19	519	5	14	Inf	3.15e-08	1.67e-07	LUAD	MOG	6	29627216	29627217	-	-	C	->C
LUAD-broad.mit.edu_GA	plate_id	928	19	519	5	14	Inf	3.15e-08	1.67e-07	LUAD	MORC1	3	108819313	108819314	-	-	T	->T
LUAD-broad.mit.edu_GA	plate_id	928	19	519	5	14	Inf	3.15e-08	1.67e-07	LUAD	NAV1	1	201779175	201779176	-	-	C	->C
LUAD-broad.mit.edu_GA	plate_id	928	19	519	5	14	Inf	3.15e-08	1.67e-07	LUAD	NUMA1	11	71746964	71746965	-	-	C	->C
LUAD-broad.mit.edu_GA	plate_id	928	19	519	5	14	Inf	3.15e-08	1.67e-07	LUAD	ODZ3	4	183609358	183609359	-	-	G	->G
LUAD-broad.mit.edu_GA	plate_id	928	19	519	5	14	Inf	3.15e-08	1.67e-07	LUAD	PDZD2	5	31799540	31799541	-	-	C	->C
LUAD-broad.mit.edu_GA	plate_id	928	19	519	5	14	Inf	3.15e-08	1.67e-07	LUAD	PDZD2	5	31799656	31799657	-	-	G	->G
LUAD-broad.mit.edu_GA	plate_id	928	19	519	5	14	Inf	3.15e-08	1.67e-07	LUAD	PIGO	9	35091522	35091523	-	-	G	->G
LUAD-broad.mit.edu_GA	plate_id	928	19	519	5	14	Inf	3.15e-08	1.67e-07	LUAD	PIK3CB	3	138413709	138413710	-	-	G	->G
LUAD-broad.mit.edu_GA	plate_id	928	19	519	5	14	Inf	3.15e-08	1.67e-07	LUAD	RAB11FIP4	17	29758897	29758898	-	-	G	->G
LUAD-broad.mit.edu_GA	plate_id	928	19	519	5	14	Inf	3.15e-08	1.67e-07	LUAD	RCSD1	1	167654710	167654711	-	-	C	->C
LUAD-broad.mit.edu_GA	plate_id	928	19	519	5	14	Inf	3.15e-08	1.67e-07	LUAD	SEMA6A	5	115782764	115782765	-	-	G	->G
LUAD-broad.mit.edu_GA	plate_id	928	19	519	5	14	Inf	3.15e-08	1.67e-07	LUAD	2016-09-10	2	110301779	110301779	A	A	C	A>C
LUAD-broad.mit.edu_GA	plate_id	928	19	519	5	14	Inf	3.15e-08	1.67e-07	LUAD	SERPIND1	22	21138419	21138420	-	-	G	->G
LUAD-broad.mit.edu_GA	plate_id	928	19	519	5	14	Inf	3.15e-08	1.67e-07	LUAD	SSH2	17	27963294	27963295	-	-	G	->G
LUAD-broad.mit.edu_GA	plate_id	928	19	519	5	14	Inf	3.15e-08	1.67e-07	LUAD	STAT2	12	56742816	56742817	-	-	G	->G
LUAD-broad.mit.edu_GA	plate_id	928	19	519	5	14	Inf	3.15e-08	1.67e-07	LUAD	TARBP1	1	234556531	234556532	-	-	T	->T
LUAD-broad.mit.edu_GA	plate_id	928	19	519	5	14	Inf	3.15e-08	1.67e-07	LUAD	TNN	1	175096158	175096159	-	-	C	->C
LUAD-broad.mit.edu_GA	plate_id	928	19	519	5	14	Inf	3.15e-08	1.67e-07	LUAD	TNRC6B	22	40681766	40681767	-	-	C	->C
LUAD-broad.mit.edu_GA	plate_id	928	19	519	5	14	Inf	3.15e-08	1.67e-07	LUAD	UNC13C	15	54630575	54630576	-	-	C	->C
LUAD-broad.mit.edu_GA	plate_id	928	19	519	5	14	Inf	3.15e-08	1.67e-07	LUAD	USH2A	1	215821895	215821896	-	-	G	->G
LUAD-broad.mit.edu_GA	plate_id	928	19	519	5	14	Inf	3.15e-08	1.67e-07	LUAD	USP30	12	109495864	109495865	-	-	C	->C
LUAD-broad.mit.edu_GA	plate_id	928	19	519	5	14	Inf	3.15e-08	1.67e-07	LUAD	UST	6	149395141	149395142	-	-	C	->C
LUAD-broad.mit.edu_GA	plate_id	928	19	519	5	14	Inf	3.15e-08	1.67e-07	LUAD	ZCWPW1	7	100000150	100000151	-	-	T	->T
LUAD-broad.mit.edu_GA	plate_id	928	19	519	5	14	Inf	3.15e-08	1.67e-07	LUAD	ZNF248	10	38121236	38121237	-	-	C	->C
LUAD-broad.mit.edu_GA	plate_id	928	19	519	5	14	Inf	3.15e-08	1.67e-07	LUAD	ZNF609	15	64967993	64967994	-	-	C	->C
KIRC-broad.mit.edu_GA_automated	plate_id	886	25	210	8	17	93.589	4.44e-08	2.91e-07	KIRC	ACSM2A	16	20489924	20489925	-	-	C	->C
KIRC-broad.mit.edu_GA_automated	plate_id	886	25	210	8	17	93.589	4.44e-08	2.91e-07	KIRC	PRRG1	X	37312610	37312611	-	-	C	->C
UCEC-broad.mit.edu_GA	plate_id	A10C	7	187	5	2	351.306	5.74e-08	2.03e-06	UCEC	SPAG17	1	118584454	118584455	-	-	G	->G
LUAD-broad.mit.edu_GA	plate_id	1040	7	531	6	1	140.356	6.11e-08	3.23e-07	LUAD	IL32	16	3119304	3119305	-	-	G	->G
KIRC-broad.mit.edu_GA_automated	plate_id	886	25	210	7	18	Inf	6.7e-08	3.5e-07	KIRC	AAAS	12	53715141	53715142	-	-	G	->G
KIRC-broad.mit.edu_GA_automated	plate_id	886	25	210	7	18	Inf	6.7e-08	3.5e-07	KIRC	ABCC5	3	183700629	183700630	-	-	C	->C
KIRC-broad.mit.edu_GA_automated	plate_id	886	25	210	7	18	Inf	6.7e-08	3.5e-07	KIRC	ACACA	17	35600370	35600371	-	-	G	->G
KIRC-broad.mit.edu_GA_automated	plate_id	886	25	210	7	18	Inf	6.7e-08	3.5e-07	KIRC	ADAM19	5	156915296	156915297	-	-	G	->G
KIRC-broad.mit.edu_GA_automated	plate_id	886	25	210	7	18	Inf	6.7e-08	3.5e-07	KIRC	AGAP3	7	150814456	150814457	-	-	G	->G
KIRC-broad.mit.edu_GA_automated	plate_id	886	25	210	7	18	Inf	6.7e-08	3.5e-07	KIRC	ANKRD50	4	125590618	125590619	-	-	C	->C
KIRC-broad.mit.edu_GA_automated	plate_id	886	25	210	7	18	Inf	6.7e-08	3.5e-07	KIRC	ARPC2	2	219099073	219099073	A	A	T	A>T
KIRC-broad.mit.edu_GA_automated	plate_id	886	25	210	7	18	Inf	6.7e-08	3.5e-07	KIRC	ATN1	12	7045699	7045700	-	-	C	->C
KIRC-broad.mit.edu_GA_automated	plate_id	886	25	210	7	18	Inf	6.7e-08	3.5e-07	KIRC	AXIN2	17	63532584	63532585	-	-	C	->C
KIRC-broad.mit.edu_GA_automated	plate_id	886	25	210	7	18	Inf	6.7e-08	3.5e-07	KIRC	BRD2	6	32948228	32948229	-	-	C	->C
KIRC-broad.mit.edu_GA_automated	plate_id	886	25	210	7	18	Inf	6.7e-08	3.5e-07	KIRC	C1S	12	7171652	7171653	-	-	C	->C
KIRC-broad.mit.edu_GA_automated	plate_id	886	25	210	7	18	Inf	6.7e-08	3.5e-07	KIRC	C1S	12	7172406	7172406	A	A	T	A>T
KIRC-broad.mit.edu_GA_automated	plate_id	886	25	210	7	18	Inf	6.7e-08	3.5e-07	KIRC	C3P1	19	10160752	10160753	-	-	C	->C
KIRC-broad.mit.edu_GA_automated	plate_id	886	25	210	7	18	Inf	6.7e-08	3.5e-07	KIRC	C6	5	41159256	41159257	-	-	G	->G
KIRC-broad.mit.edu_GA_automated	plate_id	886	25	210	7	18	Inf	6.7e-08	3.5e-07	KIRC	CECR1	22	17662759	17662760	-	-	C	->C
KIRC-broad.mit.edu_GA_automated	plate_id	886	25	210	7	18	Inf	6.7e-08	3.5e-07	KIRC	CHSY1	15	101775436	101775437	-	-	C	->C
KIRC-broad.mit.edu_GA_automated	plate_id	886	25	210	7	18	Inf	6.7e-08	3.5e-07	KIRC	CIB3	19	16275654	16275655	-	-	T	->T
KIRC-broad.mit.edu_GA_automated	plate_id	886	25	210	7	18	Inf	6.7e-08	3.5e-07	KIRC	DHRS7B	17	21094259	21094259	A	A	T	A>T
KIRC-broad.mit.edu_GA_automated	plate_id	886	25	210	7	18	Inf	6.7e-08	3.5e-07	KIRC	DPEP2	16	68021467	68021468	-	-	G	->G
KIRC-broad.mit.edu_GA_automated	plate_id	886	25	210	7	18	Inf	6.7e-08	3.5e-07	KIRC	FAM219A	9	34401027	34401028	-	-	G	->G
KIRC-broad.mit.edu_GA_automated	plate_id	886	25	210	7	18	Inf	6.7e-08	3.5e-07	KIRC	FAM83E	19	49107037	49107038	-	-	G	->G
KIRC-broad.mit.edu_GA_automated	plate_id	886	25	210	7	18	Inf	6.7e-08	3.5e-07	KIRC	FIGN	2	164467542	164467543	-	-	C	->C
KIRC-broad.mit.edu_GA_automated	plate_id	886	25	210	7	18	Inf	6.7e-08	3.5e-07	KIRC	FKBPL	6	32097085	32097086	-	-	C	->C
KIRC-broad.mit.edu_GA_automated	plate_id	886	25	210	7	18	Inf	6.7e-08	3.5e-07	KIRC	GOLT1A	1	204170835	204170836	-	-	C	->C
KIRC-broad.mit.edu_GA_automated	plate_id	886	25	210	7	18	Inf	6.7e-08	3.5e-07	KIRC	GRM3	7	86415681	86415682	-	-	C	->C
KIRC-broad.mit.edu_GA_automated	plate_id	886	25	210	7	18	Inf	6.7e-08	3.5e-07	KIRC	HERC1	15	63918305	63918306	-	-	G	->G
KIRC-broad.mit.edu_GA_automated	plate_id	886	25	210	7	18	Inf	6.7e-08	3.5e-07	KIRC	HIVEP3	1	42050006	42050007	-	-	G	->G
KIRC-broad.mit.edu_GA_automated	plate_id	886	25	210	7	18	Inf	6.7e-08	3.5e-07	KIRC	HK2	2	75104377	75104378	-	-	G	->G
KIRC-broad.mit.edu_GA_automated	plate_id	886	25	210	7	18	Inf	6.7e-08	3.5e-07	KIRC	HTR3E	3	183823745	183823746	-	-	C	->C
KIRC-broad.mit.edu_GA_automated	plate_id	886	25	210	7	18	Inf	6.7e-08	3.5e-07	KIRC	KCNH7	2	163256860	163256861	-	-	C	->C
KIRC-broad.mit.edu_GA_automated	plate_id	886	25	210	7	18	Inf	6.7e-08	3.5e-07	KIRC	LMO7	13	76375005	76375006	-	-	G	->G
KIRC-broad.mit.edu_GA_automated	plate_id	886	25	210	7	18	Inf	6.7e-08	3.5e-07	KIRC	MBNL2	13	97928603	97928604	-	-	C	->C
KIRC-broad.mit.edu_GA_automated	plate_id	886	25	210	7	18	Inf	6.7e-08	3.5e-07	KIRC	MCM3AP	21	47666704	47666705	-	-	G	->G
KIRC-broad.mit.edu_GA_automated	plate_id	886	25	210	7	18	Inf	6.7e-08	3.5e-07	KIRC	MLH1	3	37070348	37070349	-	-	C	->C
KIRC-broad.mit.edu_GA_automated	plate_id	886	25	210	7	18	Inf	6.7e-08	3.5e-07	KIRC	MUC13	3	124646628	124646629	-	-	G	->G
KIRC-broad.mit.edu_GA_automated	plate_id	886	25	210	7	18	Inf	6.7e-08	3.5e-07	KIRC	NBPF14	1	148012533	148012533	T	T	G	T>G
KIRC-broad.mit.edu_GA_automated	plate_id	886	25	210	7	18	Inf	6.7e-08	3.5e-07	KIRC	NCOA2	8	71129001	71129001	T	T	A	T>A
KIRC-broad.mit.edu_GA_automated	plate_id	886	25	210	7	18	Inf	6.7e-08	3.5e-07	KIRC	NCOA4	10	51586311	51586312	-	-	C	->C
KIRC-broad.mit.edu_GA_automated	plate_id	886	25	210	7	18	Inf	6.7e-08	3.5e-07	KIRC	NFASC	1	204924032	204924033	-	-	C	->C
KIRC-broad.mit.edu_GA_automated	plate_id	886	25	210	7	18	Inf	6.7e-08	3.5e-07	KIRC	NPIPB15	16	74423894	74423895	-	-	C	->C
KIRC-broad.mit.edu_GA_automated	plate_id	886	25	210	7	18	Inf	6.7e-08	3.5e-07	KIRC	OR10G2	14	22102924	22102925	-	-	G	->G
KIRC-broad.mit.edu_GA_automated	plate_id	886	25	210	7	18	Inf	6.7e-08	3.5e-07	KIRC	PALD1	10	72292440	72292441	-	-	G	->G
KIRC-broad.mit.edu_GA_automated	plate_id	886	25	210	7	18	Inf	6.7e-08	3.5e-07	KIRC	PCGF1	2	74732899	74732900	-	-	G	->G
KIRC-broad.mit.edu_GA_automated	plate_id	886	25	210	7	18	Inf	6.7e-08	3.5e-07	KIRC	PDE1B	12	54971059	54971060	-	-	C	->C
KIRC-broad.mit.edu_GA_automated	plate_id	886	25	210	7	18	Inf	6.7e-08	3.5e-07	KIRC	PMS2CL	7	6759412	6759413	-	-	G	->G
KIRC-broad.mit.edu_GA_automated	plate_id	886	25	210	7	18	Inf	6.7e-08	3.5e-07	KIRC	PSD2	5	139193287	139193288	-	-	G	->G
KIRC-broad.mit.edu_GA_automated	plate_id	886	25	210	7	18	Inf	6.7e-08	3.5e-07	KIRC	RBM6	3	50005144	50005145	-	-	G	->G
KIRC-broad.mit.edu_GA_automated	plate_id	886	25	210	7	18	Inf	6.7e-08	3.5e-07	KIRC	RP11-324H6.5	10	51821327	51821328	-	-	G	->G
KIRC-broad.mit.edu_GA_automated	plate_id	886	25	210	7	18	Inf	6.7e-08	3.5e-07	KIRC	SCN4A	17	62049212	62049213	-	-	G	->G
KIRC-broad.mit.edu_GA_automated	plate_id	886	25	210	7	18	Inf	6.7e-08	3.5e-07	KIRC	SERPIND1	22	21138419	21138420	-	-	G	->G
KIRC-broad.mit.edu_GA_automated	plate_id	886	25	210	7	18	Inf	6.7e-08	3.5e-07	KIRC	SEZ6L2	16	29891248	29891249	-	-	G	->G
KIRC-broad.mit.edu_GA_automated	plate_id	886	25	210	7	18	Inf	6.7e-08	3.5e-07	KIRC	SHANK1	19	51192459	51192460	-	-	C	->C
KIRC-broad.mit.edu_GA_automated	plate_id	886	25	210	7	18	Inf	6.7e-08	3.5e-07	KIRC	SLC12A5	20	44680421	44680422	-	-	G	->G
KIRC-broad.mit.edu_GA_automated	plate_id	886	25	210	7	18	Inf	6.7e-08	3.5e-07	KIRC	SLC25A48	5	135207263	135207264	-	-	G	->G
KIRC-broad.mit.edu_GA_automated	plate_id	886	25	210	7	18	Inf	6.7e-08	3.5e-07	KIRC	SLC30A9	4	42022431	42022431	A	A	T	A>T
KIRC-broad.mit.edu_GA_automated	plate_id	886	25	210	7	18	Inf	6.7e-08	3.5e-07	KIRC	SLC8A1	2	40366704	40366705	-	-	G	->G
KIRC-broad.mit.edu_GA_automated	plate_id	886	25	210	7	18	Inf	6.7e-08	3.5e-07	KIRC	SRCAP	16	30733909	30733910	-	-	G	->G
KIRC-broad.mit.edu_GA_automated	plate_id	886	25	210	7	18	Inf	6.7e-08	3.5e-07	KIRC	TAF3	10	8006928	8006929	-	-	C	->C
KIRC-broad.mit.edu_GA_automated	plate_id	886	25	210	7	18	Inf	6.7e-08	3.5e-07	KIRC	TAS2R3	7	141464711	141464711	A	A	T	A>T
KIRC-broad.mit.edu_GA_automated	plate_id	886	25	210	7	18	Inf	6.7e-08	3.5e-07	KIRC	TCOF1	5	149755744	149755745	-	-	C	->C
KIRC-broad.mit.edu_GA_automated	plate_id	886	25	210	7	18	Inf	6.7e-08	3.5e-07	KIRC	TEP1	14	20852646	20852647	-	-	C	->C
KIRC-broad.mit.edu_GA_automated	plate_id	886	25	210	7	18	Inf	6.7e-08	3.5e-07	KIRC	TRIM17	1	228596934	228596935	-	-	G	->G
KIRC-broad.mit.edu_GA_automated	plate_id	886	25	210	7	18	Inf	6.7e-08	3.5e-07	KIRC	TRUB1	10	116730191	116730192	-	-	C	->C
KIRC-broad.mit.edu_GA_automated	plate_id	886	25	210	7	18	Inf	6.7e-08	3.5e-07	KIRC	UHRF1BP1	6	34791081	34791082	-	-	C	->C
KIRC-broad.mit.edu_GA_automated	plate_id	886	25	210	7	18	Inf	6.7e-08	3.5e-07	KIRC	USP30	12	109495864	109495865	-	-	C	->C
KIRC-broad.mit.edu_GA_automated	plate_id	886	25	210	7	18	Inf	6.7e-08	3.5e-07	KIRC	USP39	2	85863227	85863228	-	-	G	->G
KIRC-broad.mit.edu_GA_automated	plate_id	886	25	210	7	18	Inf	6.7e-08	3.5e-07	KIRC	VGLL3	3	87018182	87018183	-	-	C	->C
KIRC-broad.mit.edu_GA_automated	plate_id	886	25	210	7	18	Inf	6.7e-08	3.5e-07	KIRC	VWF	12	6091108	6091109	-	-	G	->G
KIRC-broad.mit.edu_GA_automated	plate_id	886	25	210	7	18	Inf	6.7e-08	3.5e-07	KIRC	ZDHHC5	11	57464257	57464258	-	-	C	->C
KIRC-broad.mit.edu_GA_automated	plate_id	886	25	210	7	18	Inf	6.7e-08	3.5e-07	KIRC	ZMAT2	5	140083501	140083501	A	A	T	A>T
KIRC-broad.mit.edu_GA_automated	plate_id	886	25	210	7	18	Inf	6.7e-08	3.5e-07	KIRC	ZMYND15	17	4647723	4647724	-	-	C	->C
KIRC-broad.mit.edu_GA_automated	plate_id	886	25	210	7	18	Inf	6.7e-08	3.5e-07	KIRC	ZNF106	15	42742008	42742008	A	A	T	A>T
KIRC-broad.mit.edu_GA_automated	plate_id	886	25	210	7	18	Inf	6.7e-08	3.5e-07	KIRC	ZNF609	15	64973566	64973567	-	-	C	->C
KIRC-broad.mit.edu_GA_automated	plate_id	886	25	210	7	18	Inf	6.7e-08	3.5e-07	KIRC	ZNF649	19	52394013	52394014	-	-	C	->C
COAD-hgsc.bcm.edu_GA	plate_id	1719	47	172	10	37	Inf	9.12e-08	7e-05	COAD	HSPG2	1	22149935	22149935	T	T	C	T>C
COAD-hgsc.bcm.edu_GA	plate_id	1719	47	172	11	36	51.0199	1.63e-07	7e-05	COAD	MTX1	1	155178782	155178782	A	A	T	A>T
COAD-hgsc.bcm.edu_GA	plate_id	1719	47	172	11	36	51.0199	1.63e-07	7e-05	COAD	TCF15	20	590542	590542	C	C	G	C>G
COAD-hgsc.bcm.edu_GA	plate_id	1719	47	172	11	36	51.0199	1.63e-07	7e-05	COAD	TCF15	20	590543	590543	G	G	C	G>C
LUAD-broad.mit.edu_GA	plate_id	928	19	519	5	14	174.235	1.85e-07	9.7e-07	LUAD	C9orf152	9	112963553	112963554	-	-	G	->G
LUAD-broad.mit.edu_GA	plate_id	928	19	519	5	14	174.235	1.85e-07	9.7e-07	LUAD	GLG1	16	74525008	74525009	-	-	C	->C
BRCA-genome.wustl.edu_GA_curated	plate_id	A071	46	947	6	40	69.4995	1.86e-07	8.07e-05	BRCA	2016-09-10	2	110301779	110301779	A	A	C	A>C
LUAD-broad.mit.edu_GA	plate_id	969	9	529	5	4	87.8467	2.59e-07	1.35e-06	LUAD	KRTAP4-8	17	39253953	39253953	G	G	T	G>T
LUAD-broad.mit.edu_GA	plate_id	1040	7	531	4	3	207.203	3.5e-07	1.82e-06	LUAD	KRTAP4-6	17	39296599	39296599	T	T	C	T>C
KIRC-broad.mit.edu_GA_automated	plate_id	886	25	210	7	18	77.6888	4.99e-07	2.59e-06	KIRC	EEF1B2	2	207025366	207025366	G	G	A	G>A
KIRC-broad.mit.edu_GA_automated	plate_id	886	25	210	7	18	77.6888	4.99e-07	2.59e-06	KIRC	FRMD4A	10	13696451	13696452	-	-	G	->G
COAD-hgsc.bcm.edu_GA	plate_id	1719	47	172	9	38	Inf	5.04e-07	0.00012019	COAD	ATP6AP1	X	153657083	153657083	A	A	G	A>G
COAD-hgsc.bcm.edu_GA	plate_id	1719	47	172	9	38	Inf	5.04e-07	0.00012019	COAD	GPR124	8	37699195	37699195	C	C	G	C>G
COAD-hgsc.bcm.edu_GA	plate_id	1719	47	172	9	38	Inf	5.04e-07	0.00012019	COAD	RASSF5	1	206680983	206680983	A	A	C	A>C
COAD-hgsc.bcm.edu_GA	plate_id	1719	47	172	9	38	Inf	5.04e-07	0.00012019	COAD	SPHK1	17	74381555	74381555	G	G	A	G>A
UCEC-broad.mit.edu_GA	plate_id	A10C	7	187	5	2	130.334	5.27e-07	9.63e-06	UCEC	OR4M2	15	22369023	22369024	-	-	G	->G
UCEC-broad.mit.edu_GA	plate_id	A10C	7	187	4	3	Inf	6.12e-07	9.63e-06	UCEC	ADAM23	2	207460860	207460861	-	-	C	->C
UCEC-broad.mit.edu_GA	plate_id	A10C	7	187	4	3	Inf	6.12e-07	9.63e-06	UCEC	AXL	19	41743932	41743933	-	-	C	->C
UCEC-broad.mit.edu_GA	plate_id	A10C	7	187	4	3	Inf	6.12e-07	9.63e-06	UCEC	BTRC	10	103310572	103310573	-	-	C	->C
UCEC-broad.mit.edu_GA	plate_id	A10C	7	187	4	3	Inf	6.12e-07	9.63e-06	UCEC	C1S	12	7171652	7171653	-	-	C	->C
UCEC-broad.mit.edu_GA	plate_id	A10C	7	187	4	3	Inf	6.12e-07	9.63e-06	UCEC	CACNA1S	1	201046125	201046126	-	-	C	->C
UCEC-broad.mit.edu_GA	plate_id	A10C	7	187	4	3	Inf	6.12e-07	9.63e-06	UCEC	CDHR3	7	105655641	105655642	-	-	C	->C
UCEC-broad.mit.edu_GA	plate_id	A10C	7	187	4	3	Inf	6.12e-07	9.63e-06	UCEC	CNOT3	19	54649666	54649667	-	-	C	->C
UCEC-broad.mit.edu_GA	plate_id	A10C	7	187	4	3	Inf	6.12e-07	9.63e-06	UCEC	CWC15	11	94704231	94704232	-	-	G	->G
UCEC-broad.mit.edu_GA	plate_id	A10C	7	187	4	3	Inf	6.12e-07	9.63e-06	UCEC	DDB1	11	61093159	61093160	-	-	C	->C
UCEC-broad.mit.edu_GA	plate_id	A10C	7	187	4	3	Inf	6.12e-07	9.63e-06	UCEC	DDX17	22	38895454	38895455	-	-	C	->C
UCEC-broad.mit.edu_GA	plate_id	A10C	7	187	4	3	Inf	6.12e-07	9.63e-06	UCEC	DDX47	12	12974637	12974638	-	-	A	->A
UCEC-broad.mit.edu_GA	plate_id	A10C	7	187	4	3	Inf	6.12e-07	9.63e-06	UCEC	DNAH12	3	57415461	57415462	-	-	G	->G
UCEC-broad.mit.edu_GA	plate_id	A10C	7	187	4	3	Inf	6.12e-07	9.63e-06	UCEC	DSCAM	21	41514614	41514615	-	-	G	->G
UCEC-broad.mit.edu_GA	plate_id	A10C	7	187	4	3	Inf	6.12e-07	9.63e-06	UCEC	EP300	22	41574678	41574679	-	-	C	->C
UCEC-broad.mit.edu_GA	plate_id	A10C	7	187	4	3	Inf	6.12e-07	9.63e-06	UCEC	FAM151A	1	55081756	55081757	-	-	G	->G
UCEC-broad.mit.edu_GA	plate_id	A10C	7	187	4	3	Inf	6.12e-07	9.63e-06	UCEC	FBN2	5	127610310	127610311	-	-	C	->C
UCEC-broad.mit.edu_GA	plate_id	A10C	7	187	4	3	Inf	6.12e-07	9.63e-06	UCEC	FHAD1	1	15615973	15615974	-	-	C	->C
UCEC-broad.mit.edu_GA	plate_id	A10C	7	187	4	3	Inf	6.12e-07	9.63e-06	UCEC	FKBP9	7	33014803	33014804	-	-	C	->C
UCEC-broad.mit.edu_GA	plate_id	A10C	7	187	4	3	Inf	6.12e-07	9.63e-06	UCEC	FYB	5	39202090	39202091	-	-	C	->C
UCEC-broad.mit.edu_GA	plate_id	A10C	7	187	4	3	Inf	6.12e-07	9.63e-06	UCEC	ITGAV	2	187521084	187521085	-	-	G	->G
UCEC-broad.mit.edu_GA	plate_id	A10C	7	187	4	3	Inf	6.12e-07	9.63e-06	UCEC	KIRREL	1	158058202	158058203	-	-	C	->C
UCEC-broad.mit.edu_GA	plate_id	A10C	7	187	4	3	Inf	6.12e-07	9.63e-06	UCEC	KLHL13	X	117033056	117033057	-	-	C	->C
UCEC-broad.mit.edu_GA	plate_id	A10C	7	187	4	3	Inf	6.12e-07	9.63e-06	UCEC	LRRC8C	1	90179646	90179647	-	-	C	->C
UCEC-broad.mit.edu_GA	plate_id	A10C	7	187	4	3	Inf	6.12e-07	9.63e-06	UCEC	MTMR11	1	149908497	149908498	-	-	G	->G
UCEC-broad.mit.edu_GA	plate_id	A10C	7	187	4	3	Inf	6.12e-07	9.63e-06	UCEC	NKTR	3	42679035	42679036	-	-	C	->C
UCEC-broad.mit.edu_GA	plate_id	A10C	7	187	4	3	Inf	6.12e-07	9.63e-06	UCEC	PIK3C2B	1	204438071	204438072	-	-	G	->G
UCEC-broad.mit.edu_GA	plate_id	A10C	7	187	4	3	Inf	6.12e-07	9.63e-06	UCEC	SIPA1L2	1	232650637	232650638	-	-	G	->G
UCEC-broad.mit.edu_GA	plate_id	A10C	7	187	4	3	Inf	6.12e-07	9.63e-06	UCEC	SSH2	17	27959374	27959375	-	-	G	->G
UCEC-broad.mit.edu_GA	plate_id	A10C	7	187	4	3	Inf	6.12e-07	9.63e-06	UCEC	VPS13D	1	12422832	12422833	-	-	C	->C
LUAD-broad.mit.edu_GA	plate_id	928	19	519	5	14	88.0989	6.34e-07	3.27e-06	LUAD	LGI2	4	25005320	25005321	-	-	C	->C
LUAD-broad.mit.edu_GA	plate_id	928	19	519	5	14	88.0989	6.34e-07	3.27e-06	LUAD	PAPPA2	1	176563963	176563964	-	-	G	->G
LIHC-bcgsc.ca_HiSeq_automated	plate_id	A12Z	37	165	8	29	Inf	6.46e-07	0.000165742	LIHC	SPDYE1	7	44046934	44046934	G	G	A	G>A
KIRC-broad.mit.edu_GA_automated	plate_id	886	25	210	6	19	Inf	8.07e-07	3.29e-06	KIRC	ABHD12B	14	51347189	51347190	-	-	G	->G
KIRC-broad.mit.edu_GA_automated	plate_id	886	25	210	6	19	Inf	8.07e-07	3.29e-06	KIRC	ANGPTL6	19	10204185	10204186	-	-	C	->C
KIRC-broad.mit.edu_GA_automated	plate_id	886	25	210	6	19	Inf	8.07e-07	3.29e-06	KIRC	ANK2	4	114280134	114280135	-	-	G	->G
KIRC-broad.mit.edu_GA_automated	plate_id	886	25	210	6	19	Inf	8.07e-07	3.29e-06	KIRC	ANKRD19P	9	95649123	95649124	-	-	C	->C
KIRC-broad.mit.edu_GA_automated	plate_id	886	25	210	6	19	Inf	8.07e-07	3.29e-06	KIRC	ARRB1	11	74988494	74988495	-	-	G	->G
KIRC-broad.mit.edu_GA_automated	plate_id	886	25	210	6	19	Inf	8.07e-07	3.29e-06	KIRC	ASH1L	1	155491185	155491186	-	-	T	->T
KIRC-broad.mit.edu_GA_automated	plate_id	886	25	210	6	19	Inf	8.07e-07	3.29e-06	KIRC	ATF4	22	39917950	39917951	-	-	C	->C
KIRC-broad.mit.edu_GA_automated	plate_id	886	25	210	6	19	Inf	8.07e-07	3.29e-06	KIRC	ATXN7	3	63981831	63981832	-	-	C	->C
KIRC-broad.mit.edu_GA_automated	plate_id	886	25	210	6	19	Inf	8.07e-07	3.29e-06	KIRC	BIRC6	2	32832520	32832520	A	A	T	A>T
KIRC-broad.mit.edu_GA_automated	plate_id	886	25	210	6	19	Inf	8.07e-07	3.29e-06	KIRC	C19orf47	19	40834398	40834399	-	-	G	->G
KIRC-broad.mit.edu_GA_automated	plate_id	886	25	210	6	19	Inf	8.07e-07	3.29e-06	KIRC	C1S	12	7177938	7177939	-	-	C	->C
KIRC-broad.mit.edu_GA_automated	plate_id	886	25	210	6	19	Inf	8.07e-07	3.29e-06	KIRC	CCDC180	9	100082417	100082418	-	-	C	->C
KIRC-broad.mit.edu_GA_automated	plate_id	886	25	210	6	19	Inf	8.07e-07	3.29e-06	KIRC	CCDC97	19	41825517	41825518	-	-	C	->C
KIRC-broad.mit.edu_GA_automated	plate_id	886	25	210	6	19	Inf	8.07e-07	3.29e-06	KIRC	CST1	20	23729753	23729754	-	-	C	->C
KIRC-broad.mit.edu_GA_automated	plate_id	886	25	210	6	19	Inf	8.07e-07	3.29e-06	KIRC	DDR1	6	30867830	30867831	-	-	G	->G
KIRC-broad.mit.edu_GA_automated	plate_id	886	25	210	6	19	Inf	8.07e-07	3.29e-06	KIRC	EP400	12	132466645	132466646	-	-	C	->C
KIRC-broad.mit.edu_GA_automated	plate_id	886	25	210	6	19	Inf	8.07e-07	3.29e-06	KIRC	ETV1	7	13975472	13975473	-	-	G	->G
KIRC-broad.mit.edu_GA_automated	plate_id	886	25	210	6	19	Inf	8.07e-07	3.29e-06	KIRC	EXTL2	1	101339500	101339500	A	A	T	A>T
KIRC-broad.mit.edu_GA_automated	plate_id	886	25	210	6	19	Inf	8.07e-07	3.29e-06	KIRC	FAM117B	2	203621968	203621969	-	-	C	->C
KIRC-broad.mit.edu_GA_automated	plate_id	886	25	210	6	19	Inf	8.07e-07	3.29e-06	KIRC	FAM122C	X	133948799	133948799	A	A	T	A>T
KIRC-broad.mit.edu_GA_automated	plate_id	886	25	210	6	19	Inf	8.07e-07	3.29e-06	KIRC	FAM122C	X	133948805	133948805	A	A	T	A>T
KIRC-broad.mit.edu_GA_automated	plate_id	886	25	210	6	19	Inf	8.07e-07	3.29e-06	KIRC	FAP	2	163044875	163044875	T	T	A	T>A
KIRC-broad.mit.edu_GA_automated	plate_id	886	25	210	6	19	Inf	8.07e-07	3.29e-06	KIRC	FBXO24	7	100187685	100187686	-	-	C	->C
KIRC-broad.mit.edu_GA_automated	plate_id	886	25	210	6	19	Inf	8.07e-07	3.29e-06	KIRC	FMOD	1	203316599	203316600	-	-	C	->C
KIRC-broad.mit.edu_GA_automated	plate_id	886	25	210	6	19	Inf	8.07e-07	3.29e-06	KIRC	GLB1L3	11	134181004	134181005	-	-	C	->C
KIRC-broad.mit.edu_GA_automated	plate_id	886	25	210	6	19	Inf	8.07e-07	3.29e-06	KIRC	HERC2	15	28478873	28478874	-	-	G	->G
KIRC-broad.mit.edu_GA_automated	plate_id	886	25	210	6	19	Inf	8.07e-07	3.29e-06	KIRC	HTR3C	3	183777416	183777417	-	-	C	->C
KIRC-broad.mit.edu_GA_automated	plate_id	886	25	210	6	19	Inf	8.07e-07	3.29e-06	KIRC	IL17RB	3	53898813	53898814	-	-	C	->C
KIRC-broad.mit.edu_GA_automated	plate_id	886	25	210	6	19	Inf	8.07e-07	3.29e-06	KIRC	KCNB1	20	47989890	47989891	-	-	G	->G
KIRC-broad.mit.edu_GA_automated	plate_id	886	25	210	6	19	Inf	8.07e-07	3.29e-06	KIRC	KCTD19	16	67325657	67325658	-	-	G	->G
KIRC-broad.mit.edu_GA_automated	plate_id	886	25	210	6	19	Inf	8.07e-07	3.29e-06	KIRC	KIF15	3	44856401	44856401	A	A	T	A>T
KIRC-broad.mit.edu_GA_automated	plate_id	886	25	210	6	19	Inf	8.07e-07	3.29e-06	KIRC	KIF21A	12	39757017	39757017	T	T	A	T>A
KIRC-broad.mit.edu_GA_automated	plate_id	886	25	210	6	19	Inf	8.07e-07	3.29e-06	KIRC	LETMD1	12	51447559	51447559	A	A	T	A>T
KIRC-broad.mit.edu_GA_automated	plate_id	886	25	210	6	19	Inf	8.07e-07	3.29e-06	KIRC	LL22NC03-80A10.6	22	22661173	22661174	-	-	C	->C
KIRC-broad.mit.edu_GA_automated	plate_id	886	25	210	6	19	Inf	8.07e-07	3.29e-06	KIRC	MAP7D3	X	135314193	135314194	-	-	G	->G
KIRC-broad.mit.edu_GA_automated	plate_id	886	25	210	6	19	Inf	8.07e-07	3.29e-06	KIRC	MAPK14	6	36068005	36068006	-	-	C	->C
KIRC-broad.mit.edu_GA_automated	plate_id	886	25	210	6	19	Inf	8.07e-07	3.29e-06	KIRC	MEGF8	19	42866542	42866543	-	-	C	->C
KIRC-broad.mit.edu_GA_automated	plate_id	886	25	210	6	19	Inf	8.07e-07	3.29e-06	KIRC	METTL21B	12	58174036	58174037	-	-	G	->G
KIRC-broad.mit.edu_GA_automated	plate_id	886	25	210	6	19	Inf	8.07e-07	3.29e-06	KIRC	MLLT10	10	21962451	21962452	-	-	G	->G
KIRC-broad.mit.edu_GA_automated	plate_id	886	25	210	6	19	Inf	8.07e-07	3.29e-06	KIRC	MRPL10	17	45905873	45905874	-	-	G	->G
KIRC-broad.mit.edu_GA_automated	plate_id	886	25	210	6	19	Inf	8.07e-07	3.29e-06	KIRC	NACA	12	57114417	57114418	-	-	G	->G
KIRC-broad.mit.edu_GA_automated	plate_id	886	25	210	6	19	Inf	8.07e-07	3.29e-06	KIRC	NETO2	16	47165938	47165938	T	T	A	T>A
KIRC-broad.mit.edu_GA_automated	plate_id	886	25	210	6	19	Inf	8.07e-07	3.29e-06	KIRC	NPAS3	14	33836390	33836390	A	A	T	A>T
KIRC-broad.mit.edu_GA_automated	plate_id	886	25	210	6	19	Inf	8.07e-07	3.29e-06	KIRC	NPY2R	4	156135042	156135042	A	A	T	A>T
KIRC-broad.mit.edu_GA_automated	plate_id	886	25	210	6	19	Inf	8.07e-07	3.29e-06	KIRC	NSFL1C	20	1426464	1426465	-	-	G	->G
KIRC-broad.mit.edu_GA_automated	plate_id	886	25	210	6	19	Inf	8.07e-07	3.29e-06	KIRC	NUP214	9	134073007	134073008	-	-	C	->C
KIRC-broad.mit.edu_GA_automated	plate_id	886	25	210	6	19	Inf	8.07e-07	3.29e-06	KIRC	NUPL2	7	23224772	23224773	-	-	G	->G
KIRC-broad.mit.edu_GA_automated	plate_id	886	25	210	6	19	Inf	8.07e-07	3.29e-06	KIRC	NWD1	19	16860826	16860827	-	-	C	->C
KIRC-broad.mit.edu_GA_automated	plate_id	886	25	210	6	19	Inf	8.07e-07	3.29e-06	KIRC	OR4A47	11	48511107	48511107	A	A	T	A>T
KIRC-broad.mit.edu_GA_automated	plate_id	886	25	210	6	19	Inf	8.07e-07	3.29e-06	KIRC	OSBPL7	17	45886342	45886343	-	-	G	->G
KIRC-broad.mit.edu_GA_automated	plate_id	886	25	210	6	19	Inf	8.07e-07	3.29e-06	KIRC	PATL1	11	59425145	59425146	-	-	G	->G
KIRC-broad.mit.edu_GA_automated	plate_id	886	25	210	6	19	Inf	8.07e-07	3.29e-06	KIRC	PCDHGC3	5	140857727	140857728	-	-	C	->C
KIRC-broad.mit.edu_GA_automated	plate_id	886	25	210	6	19	Inf	8.07e-07	3.29e-06	KIRC	PCGF2	17	36896586	36896587	-	-	C	->C
KIRC-broad.mit.edu_GA_automated	plate_id	886	25	210	6	19	Inf	8.07e-07	3.29e-06	KIRC	PCSK1	5	95746639	95746640	-	-	C	->C
KIRC-broad.mit.edu_GA_automated	plate_id	886	25	210	6	19	Inf	8.07e-07	3.29e-06	KIRC	PDIA5	3	122869088	122869089	-	-	C	->C
KIRC-broad.mit.edu_GA_automated	plate_id	886	25	210	6	19	Inf	8.07e-07	3.29e-06	KIRC	PGLYRP4	1	153317810	153317811	-	-	C	->C
KIRC-broad.mit.edu_GA_automated	plate_id	886	25	210	6	19	Inf	8.07e-07	3.29e-06	KIRC	PHF3	6	64389899	64389899	A	A	T	A>T
KIRC-broad.mit.edu_GA_automated	plate_id	886	25	210	6	19	Inf	8.07e-07	3.29e-06	KIRC	PLXNA2	1	208315786	208315787	-	-	G	->G
KIRC-broad.mit.edu_GA_automated	plate_id	886	25	210	6	19	Inf	8.07e-07	3.29e-06	KIRC	POLR3E	16	22339833	22339834	-	-	C	->C
KIRC-broad.mit.edu_GA_automated	plate_id	886	25	210	6	19	Inf	8.07e-07	3.29e-06	KIRC	PPP1R10	6	30569333	30569334	-	-	G	->G
KIRC-broad.mit.edu_GA_automated	plate_id	886	25	210	6	19	Inf	8.07e-07	3.29e-06	KIRC	PRB1	12	11506884	11506885	-	-	G	->G
KIRC-broad.mit.edu_GA_automated	plate_id	886	25	210	6	19	Inf	8.07e-07	3.29e-06	KIRC	PRDM4	12	108127989	108127989	A	A	T	A>T
KIRC-broad.mit.edu_GA_automated	plate_id	886	25	210	6	19	Inf	8.07e-07	3.29e-06	KIRC	PROX1	1	214170285	214170286	-	-	C	->C
KIRC-broad.mit.edu_GA_automated	plate_id	886	25	210	6	19	Inf	8.07e-07	3.29e-06	KIRC	PRTG	15	55912218	55912219	-	-	G	->G
KIRC-broad.mit.edu_GA_automated	plate_id	886	25	210	6	19	Inf	8.07e-07	3.29e-06	KIRC	PXMP2	12	133277869	133277870	-	-	G	->G
KIRC-broad.mit.edu_GA_automated	plate_id	886	25	210	6	19	Inf	8.07e-07	3.29e-06	KIRC	RANBP2	2	109378555	109378555	A	A	T	A>T
KIRC-broad.mit.edu_GA_automated	plate_id	886	25	210	6	19	Inf	8.07e-07	3.29e-06	KIRC	RBPJL	20	43940237	43940238	-	-	C	->C
KIRC-broad.mit.edu_GA_automated	plate_id	886	25	210	6	19	Inf	8.07e-07	3.29e-06	KIRC	RCSD1	1	167654710	167654711	-	-	C	->C
KIRC-broad.mit.edu_GA_automated	plate_id	886	25	210	6	19	Inf	8.07e-07	3.29e-06	KIRC	REV3L	6	111693903	111693904	-	-	G	->G
KIRC-broad.mit.edu_GA_automated	plate_id	886	25	210	6	19	Inf	8.07e-07	3.29e-06	KIRC	RING1	6	33178989	33178990	-	-	G	->G
KIRC-broad.mit.edu_GA_automated	plate_id	886	25	210	6	19	Inf	8.07e-07	3.29e-06	KIRC	RP11-17L5.4	15	79529452	79529453	-	-	G	->G
KIRC-broad.mit.edu_GA_automated	plate_id	886	25	210	6	19	Inf	8.07e-07	3.29e-06	KIRC	RYR3	15	34078053	34078054	-	-	C	->C
KIRC-broad.mit.edu_GA_automated	plate_id	886	25	210	6	19	Inf	8.07e-07	3.29e-06	KIRC	SAP130	2	128774049	128774050	-	-	G	->G
KIRC-broad.mit.edu_GA_automated	plate_id	886	25	210	6	19	Inf	8.07e-07	3.29e-06	KIRC	SERPINA1	14	94844884	94844885	-	-	G	->G
KIRC-broad.mit.edu_GA_automated	plate_id	886	25	210	6	19	Inf	8.07e-07	3.29e-06	KIRC	SIK3	11	116733010	116733011	-	-	C	->C
KIRC-broad.mit.edu_GA_automated	plate_id	886	25	210	6	19	Inf	8.07e-07	3.29e-06	KIRC	SLC35F1	6	118635189	118635189	A	A	T	A>T
KIRC-broad.mit.edu_GA_automated	plate_id	886	25	210	6	19	Inf	8.07e-07	3.29e-06	KIRC	SLC8A2	19	47935586	47935587	-	-	G	->G
KIRC-broad.mit.edu_GA_automated	plate_id	886	25	210	6	19	Inf	8.07e-07	3.29e-06	KIRC	SLX4	16	3634840	3634841	-	-	G	->G
KIRC-broad.mit.edu_GA_automated	plate_id	886	25	210	6	19	Inf	8.07e-07	3.29e-06	KIRC	SMARCC2	12	56558259	56558260	-	-	G	->G
KIRC-broad.mit.edu_GA_automated	plate_id	886	25	210	6	19	Inf	8.07e-07	3.29e-06	KIRC	SMG7	1	183495733	183495733	A	A	T	A>T
KIRC-broad.mit.edu_GA_automated	plate_id	886	25	210	6	19	Inf	8.07e-07	3.29e-06	KIRC	SORBS2	4	186515043	186515044	-	-	C	->C
KIRC-broad.mit.edu_GA_automated	plate_id	886	25	210	6	19	Inf	8.07e-07	3.29e-06	KIRC	SRRT	7	100479331	100479332	-	-	G	->G
KIRC-broad.mit.edu_GA_automated	plate_id	886	25	210	6	19	Inf	8.07e-07	3.29e-06	KIRC	STAT6	12	57499093	57499094	-	-	G	->G
KIRC-broad.mit.edu_GA_automated	plate_id	886	25	210	6	19	Inf	8.07e-07	3.29e-06	KIRC	STK10	5	171517344	171517345	-	-	T	->T
KIRC-broad.mit.edu_GA_automated	plate_id	886	25	210	6	19	Inf	8.07e-07	3.29e-06	KIRC	SYTL2	11	85435355	85435356	-	-	G	->G
KIRC-broad.mit.edu_GA_automated	plate_id	886	25	210	6	19	Inf	8.07e-07	3.29e-06	KIRC	TARS2	1	150477198	150477199	-	-	G	->G
KIRC-broad.mit.edu_GA_automated	plate_id	886	25	210	6	19	Inf	8.07e-07	3.29e-06	KIRC	TEK	9	27204925	27204926	-	-	G	->G
KIRC-broad.mit.edu_GA_automated	plate_id	886	25	210	6	19	Inf	8.07e-07	3.29e-06	KIRC	TICRR	15	90125915	90125915	A	A	T	A>T
KIRC-broad.mit.edu_GA_automated	plate_id	886	25	210	6	19	Inf	8.07e-07	3.29e-06	KIRC	TMCC3	12	94975857	94975858	-	-	G	->G
KIRC-broad.mit.edu_GA_automated	plate_id	886	25	210	6	19	Inf	8.07e-07	3.29e-06	KIRC	TNC	9	117797538	117797539	-	-	G	->G
KIRC-broad.mit.edu_GA_automated	plate_id	886	25	210	6	19	Inf	8.07e-07	3.29e-06	KIRC	TOPORS	9	32541877	32541877	A	A	T	A>T
KIRC-broad.mit.edu_GA_automated	plate_id	886	25	210	6	19	Inf	8.07e-07	3.29e-06	KIRC	TRAV3	14	22192097	22192098	-	-	C	->C
KIRC-broad.mit.edu_GA_automated	plate_id	886	25	210	6	19	Inf	8.07e-07	3.29e-06	KIRC	UNC5C	4	96091356	96091357	-	-	G	->G
KIRC-broad.mit.edu_GA_automated	plate_id	886	25	210	6	19	Inf	8.07e-07	3.29e-06	KIRC	VILL	3	38043303	38043304	-	-	C	->C
KIRC-broad.mit.edu_GA_automated	plate_id	886	25	210	6	19	Inf	8.07e-07	3.29e-06	KIRC	WSCD1	17	6012978	6012979	-	-	C	->C
KIRC-broad.mit.edu_GA_automated	plate_id	886	25	210	6	19	Inf	8.07e-07	3.29e-06	KIRC	Z84812.4	16	81765	81766	-	-	C	->C
KIRC-broad.mit.edu_GA_automated	plate_id	886	25	210	6	19	Inf	8.07e-07	3.29e-06	KIRC	ZBTB39	12	57396635	57396636	-	-	G	->G
KIRC-broad.mit.edu_GA_automated	plate_id	886	25	210	6	19	Inf	8.07e-07	3.29e-06	KIRC	ZNF280A	22	22869526	22869527	-	-	G	->G
KIRC-broad.mit.edu_GA_automated	plate_id	886	25	210	6	19	Inf	8.07e-07	3.29e-06	KIRC	ZNF878	19	12155624	12155625	-	-	T	->T
KIRC-broad.mit.edu_GA_automated	plate_id	886	25	210	6	19	Inf	8.07e-07	3.29e-06	KIRC	ZNF878	19	12155708	12155709	-	-	T	->T
KIRC-broad.mit.edu_GA_automated	plate_id	886	25	210	6	19	Inf	8.07e-07	3.29e-06	KIRC	ZSWIM8	10	75560463	75560464	-	-	C	->C
COAD-hgsc.bcm.edu_GA	plate_id	1719	47	172	10	37	45.1697	8.42e-07	0.000159347	COAD	SCARF2	22	20780097	20780097	G	G	C	G>C
COAD-hgsc.bcm.edu_GA	plate_id	1719	47	172	10	37	45.1697	8.42e-07	0.000159347	COAD	THEM6	8	143809193	143809193	C	C	T	C>T
COAD-hgsc.bcm.edu_GA	plate_id	1719	47	172	11	36	25.4243	8.91e-07	0.000159347	COAD	TMEM131	2	98611994	98611994	G	G	T	G>T
LGG-broad.mit.edu_GA_automated	plate_id	1705	28	502	8	20	17.5705	1.09e-06	0.000188565	LGG	PDXDC2P	16	70065826	70065826	T	T	C	T>C
UCEC-broad.mit.edu_GA	plate_id	A10M	17	177	7	10	38.4009	1.1e-06	1.7e-05	UCEC	PLAC4	21	42551472	42551473	-	-	T	->T
LUAD-broad.mit.edu_GA	plate_id	928	19	519	4	15	Inf	1.12e-06	4.61e-06	LUAD	A2ML1	12	9001442	9001443	-	-	C	->C
LUAD-broad.mit.edu_GA	plate_id	928	19	519	4	15	Inf	1.12e-06	4.61e-06	LUAD	ADAMTSL1	9	18829842	18829843	-	-	C	->C
LUAD-broad.mit.edu_GA	plate_id	928	19	519	4	15	Inf	1.12e-06	4.61e-06	LUAD	AHI1	6	135784283	135784284	-	-	T	->T
LUAD-broad.mit.edu_GA	plate_id	928	19	519	4	15	Inf	1.12e-06	4.61e-06	LUAD	AK310665	17	20332094	20332094	C	C	T	C>T
LUAD-broad.mit.edu_GA	plate_id	928	19	519	4	15	Inf	1.12e-06	4.61e-06	LUAD	ANKRD50	4	125590618	125590619	-	-	C	->C
LUAD-broad.mit.edu_GA	plate_id	928	19	519	4	15	Inf	1.12e-06	4.61e-06	LUAD	ATP1A2	1	160093110	160093111	-	-	G	->G
LUAD-broad.mit.edu_GA	plate_id	928	19	519	4	15	Inf	1.12e-06	4.61e-06	LUAD	ATP7B	13	52532497	52532498	-	-	G	->G
LUAD-broad.mit.edu_GA	plate_id	928	19	519	4	15	Inf	1.12e-06	4.61e-06	LUAD	BRD2	6	32948228	32948229	-	-	C	->C
LUAD-broad.mit.edu_GA	plate_id	928	19	519	4	15	Inf	1.12e-06	4.61e-06	LUAD	BTRC	10	103310572	103310573	-	-	C	->C
LUAD-broad.mit.edu_GA	plate_id	928	19	519	4	15	Inf	1.12e-06	4.61e-06	LUAD	BUB1B	15	40477505	40477506	-	-	C	->C
LUAD-broad.mit.edu_GA	plate_id	928	19	519	4	15	Inf	1.12e-06	4.61e-06	LUAD	CEACAM5	19	42224865	42224866	-	-	C	->C
LUAD-broad.mit.edu_GA	plate_id	928	19	519	4	15	Inf	1.12e-06	4.61e-06	LUAD	CFI	4	110662158	110662159	-	-	C	->C
LUAD-broad.mit.edu_GA	plate_id	928	19	519	4	15	Inf	1.12e-06	4.61e-06	LUAD	COL4A5	X	107834821	107834822	-	-	C	->C
LUAD-broad.mit.edu_GA	plate_id	928	19	519	4	15	Inf	1.12e-06	4.61e-06	LUAD	CTSG	14	25042847	25042848	-	-	G	->G
LUAD-broad.mit.edu_GA	plate_id	928	19	519	4	15	Inf	1.12e-06	4.61e-06	LUAD	DCHS1	11	6662141	6662142	-	-	G	->G
LUAD-broad.mit.edu_GA	plate_id	928	19	519	4	15	Inf	1.12e-06	4.61e-06	LUAD	ECM1	1	150482150	150482151	-	-	C	->C
LUAD-broad.mit.edu_GA	plate_id	928	19	519	4	15	Inf	1.12e-06	4.61e-06	LUAD	EIF4G2	11	10820934	10820935	-	-	G	->G
LUAD-broad.mit.edu_GA	plate_id	928	19	519	4	15	Inf	1.12e-06	4.61e-06	LUAD	EPB41L4A	5	111519753	111519754	-	-	T	->T
LUAD-broad.mit.edu_GA	plate_id	928	19	519	4	15	Inf	1.12e-06	4.61e-06	LUAD	FAM129A	1	184764537	184764538	-	-	C	->C
LUAD-broad.mit.edu_GA	plate_id	928	19	519	4	15	Inf	1.12e-06	4.61e-06	LUAD	FILIP1L	3	99568272	99568273	-	-	T	->T
LUAD-broad.mit.edu_GA	plate_id	928	19	519	4	15	Inf	1.12e-06	4.61e-06	LUAD	FKBP9L	7	55759092	55759093	-	-	G	->G
LUAD-broad.mit.edu_GA	plate_id	928	19	519	4	15	Inf	1.12e-06	4.61e-06	LUAD	GPR112	X	135426885	135426886	-	-	A	->A
LUAD-broad.mit.edu_GA	plate_id	928	19	519	4	15	Inf	1.12e-06	4.61e-06	LUAD	HCRTR2	6	55113573	55113574	-	-	T	->T
LUAD-broad.mit.edu_GA	plate_id	928	19	519	4	15	Inf	1.12e-06	4.61e-06	LUAD	HERC1	15	63918305	63918306	-	-	G	->G
LUAD-broad.mit.edu_GA	plate_id	928	19	519	4	15	Inf	1.12e-06	4.61e-06	LUAD	HK2	2	75104377	75104378	-	-	G	->G
LUAD-broad.mit.edu_GA	plate_id	928	19	519	4	15	Inf	1.12e-06	4.61e-06	LUAD	IGSF9	1	159904586	159904587	-	-	G	->G
LUAD-broad.mit.edu_GA	plate_id	928	19	519	4	15	Inf	1.12e-06	4.61e-06	LUAD	JAM3	11	134018467	134018468	-	-	G	->G
LUAD-broad.mit.edu_GA	plate_id	928	19	519	4	15	Inf	1.12e-06	4.61e-06	LUAD	KCNH7	2	163256860	163256861	-	-	C	->C
LUAD-broad.mit.edu_GA	plate_id	928	19	519	4	15	Inf	1.12e-06	4.61e-06	LUAD	KHDRBS1	1	32503458	32503459	-	-	G	->G
LUAD-broad.mit.edu_GA	plate_id	928	19	519	4	15	Inf	1.12e-06	4.61e-06	LUAD	KIF16B	20	16407830	16407831	-	-	C	->C
LUAD-broad.mit.edu_GA	plate_id	928	19	519	4	15	Inf	1.12e-06	4.61e-06	LUAD	KLF3	4	38691475	38691476	-	-	C	->C
LUAD-broad.mit.edu_GA	plate_id	928	19	519	4	15	Inf	1.12e-06	4.61e-06	LUAD	KSR2	12	117977604	117977605	-	-	G	->G
LUAD-broad.mit.edu_GA	plate_id	928	19	519	4	15	Inf	1.12e-06	4.61e-06	LUAD	MCM3AP	21	47663396	47663397	-	-	G	->G
LUAD-broad.mit.edu_GA	plate_id	928	19	519	4	15	Inf	1.12e-06	4.61e-06	LUAD	MCM3AP	21	47666704	47666705	-	-	G	->G
LUAD-broad.mit.edu_GA	plate_id	928	19	519	4	15	Inf	1.12e-06	4.61e-06	LUAD	MRPL24	1	156708444	156708445	-	-	G	->G
LUAD-broad.mit.edu_GA	plate_id	928	19	519	4	15	Inf	1.12e-06	4.61e-06	LUAD	MSH6	2	48030796	48030797	-	-	G	->G
LUAD-broad.mit.edu_GA	plate_id	928	19	519	4	15	Inf	1.12e-06	4.61e-06	LUAD	MSI1	12	120800902	120800903	-	-	C	->C
LUAD-broad.mit.edu_GA	plate_id	928	19	519	4	15	Inf	1.12e-06	4.61e-06	LUAD	MUC13	3	124646628	124646629	-	-	G	->G
LUAD-broad.mit.edu_GA	plate_id	928	19	519	4	15	Inf	1.12e-06	4.61e-06	LUAD	MYO7A	11	76873960	76873961	-	-	C	->C
LUAD-broad.mit.edu_GA	plate_id	928	19	519	4	15	Inf	1.12e-06	4.61e-06	LUAD	MYOF	10	95169434	95169435	-	-	C	->C
LUAD-broad.mit.edu_GA	plate_id	928	19	519	4	15	Inf	1.12e-06	4.61e-06	LUAD	NBPF14	1	148012533	148012533	T	T	G	T>G
LUAD-broad.mit.edu_GA	plate_id	928	19	519	4	15	Inf	1.12e-06	4.61e-06	LUAD	NUPL2	7	23224772	23224773	-	-	G	->G
LUAD-broad.mit.edu_GA	plate_id	928	19	519	4	15	Inf	1.12e-06	4.61e-06	LUAD	OR10G2	14	22102924	22102925	-	-	G	->G
LUAD-broad.mit.edu_GA	plate_id	928	19	519	4	15	Inf	1.12e-06	4.61e-06	LUAD	OR51E1	11	4674216	4674217	-	-	G	->G
LUAD-broad.mit.edu_GA	plate_id	928	19	519	4	15	Inf	1.12e-06	4.61e-06	LUAD	PLXNA2	1	208315786	208315787	-	-	G	->G
LUAD-broad.mit.edu_GA	plate_id	928	19	519	4	15	Inf	1.12e-06	4.61e-06	LUAD	PPFIA2	12	81741386	81741387	-	-	G	->G
LUAD-broad.mit.edu_GA	plate_id	928	19	519	4	15	Inf	1.12e-06	4.61e-06	LUAD	PPP2R2B	5	145969651	145969652	-	-	C	->C
LUAD-broad.mit.edu_GA	plate_id	928	19	519	4	15	Inf	1.12e-06	4.61e-06	LUAD	RBM6	3	50005144	50005145	-	-	G	->G
LUAD-broad.mit.edu_GA	plate_id	928	19	519	4	15	Inf	1.12e-06	4.61e-06	LUAD	RLN2	9	5304560	5304561	-	-	A	->A
LUAD-broad.mit.edu_GA	plate_id	928	19	519	4	15	Inf	1.12e-06	4.61e-06	LUAD	RPN2	20	35860725	35860726	-	-	C	->C
LUAD-broad.mit.edu_GA	plate_id	928	19	519	4	15	Inf	1.12e-06	4.61e-06	LUAD	RRH	4	110763720	110763721	-	-	C	->C
LUAD-broad.mit.edu_GA	plate_id	928	19	519	4	15	Inf	1.12e-06	4.61e-06	LUAD	RYR3	15	34015000	34015001	-	-	G	->G
LUAD-broad.mit.edu_GA	plate_id	928	19	519	4	15	Inf	1.12e-06	4.61e-06	LUAD	SFMBT1	3	52962211	52962212	-	-	G	->G
LUAD-broad.mit.edu_GA	plate_id	928	19	519	4	15	Inf	1.12e-06	4.61e-06	LUAD	SIK3	11	116733010	116733011	-	-	C	->C
LUAD-broad.mit.edu_GA	plate_id	928	19	519	4	15	Inf	1.12e-06	4.61e-06	LUAD	SLC8A1	2	40366704	40366705	-	-	G	->G
LUAD-broad.mit.edu_GA	plate_id	928	19	519	4	15	Inf	1.12e-06	4.61e-06	LUAD	SZT2	1	43896326	43896327	-	-	G	->G
LUAD-broad.mit.edu_GA	plate_id	928	19	519	4	15	Inf	1.12e-06	4.61e-06	LUAD	TAF3	10	8006928	8006929	-	-	C	->C
LUAD-broad.mit.edu_GA	plate_id	928	19	519	4	15	Inf	1.12e-06	4.61e-06	LUAD	TEK	9	27204925	27204926	-	-	G	->G
LUAD-broad.mit.edu_GA	plate_id	928	19	519	4	15	Inf	1.12e-06	4.61e-06	LUAD	THSD1P1	13	52864001	52864001	A	A	G	A>G
LUAD-broad.mit.edu_GA	plate_id	928	19	519	4	15	Inf	1.12e-06	4.61e-06	LUAD	TM9SF4	20	30737490	30737491	-	-	C	->C
LUAD-broad.mit.edu_GA	plate_id	928	19	519	4	15	Inf	1.12e-06	4.61e-06	LUAD	TNPO3	7	128610258	128610259	-	-	G	->G
LUAD-broad.mit.edu_GA	plate_id	928	19	519	4	15	Inf	1.12e-06	4.61e-06	LUAD	VRTN	14	74824462	74824463	-	-	G	->G
LUAD-broad.mit.edu_GA	plate_id	928	19	519	4	15	Inf	1.12e-06	4.61e-06	LUAD	abParts	14	106725136	106725137	-	-	C	->C
LUAD-broad.mit.edu_GA	plate_id	1040	7	531	4	3	128.668	1.25e-06	5.12e-06	LUAD	TBC1D3P2	17	60342294	60342294	A	A	C	A>C
KIRC-broad.mit.edu_GA_automated	plate_id	966	27	208	6	21	Inf	1.35e-06	5.49e-06	KIRC	FAM53C	5	137680780	137680781	-	-	G	->G
STAD-broad.mit.edu_GA	plate_id	2340	39	206	8	31	51.5486	1.71e-06	0.000956992	STAD	ANKRD20A9P	13	19419995	19419995	C	C	G	C>G
STAD-broad.mit.edu_GA	plate_id	2340	39	206	8	31	51.5486	1.71e-06	0.000956992	STAD	RRN3P3	16	22441236	22441236	G	G	A	G>A
LUAD-broad.mit.edu_GA	plate_id	2284	15	523	7	8	21.5997	1.75e-06	7.16e-06	LUAD	LOC650368	11	3427845	3427845	C	C	T	C>T
KIRC-broad.mit.edu_GA_automated	plate_id	966	27	208	10	17	14.3608	1.78e-06	7.22e-06	KIRC	CDC27	17	45219612	45219612	A	A	-	A>-
COAD-hgsc.bcm.edu_GA	tss_id	AA	13	206	5	8	116.597	1.87e-06	0.0027561	COAD	PCDHB5	5	140516795	140516795	C	C	T	C>T
PRAD-broad.mit.edu_GA_automated	plate_id	2114	52	373	7	45	56.7258	2.05e-06	0.000809848	PRAD	EEF1B2	2	207025358	207025358	A	A	G	A>G
LUAD-broad.mit.edu_GA	plate_id	1040	7	531	4	3	108.382	2.07e-06	8.43e-06	LUAD	EMG1	12	7080212	7080213	-	-	C	->C
COAD-hgsc.bcm.edu_GA	plate_id	1719	47	172	8	39	Inf	2.73e-06	0.000308018	COAD	CD8B	2	87088964	87088964	A	A	G	A>G
COAD-hgsc.bcm.edu_GA	plate_id	1719	47	172	8	39	Inf	2.73e-06	0.000308018	COAD	DOT1L	19	2226676	2226676	G	G	A	G>A
COAD-hgsc.bcm.edu_GA	plate_id	1719	47	172	8	39	Inf	2.73e-06	0.000308018	COAD	FAM120C	X	54209387	54209387	A	A	G	A>G
COAD-hgsc.bcm.edu_GA	plate_id	1719	47	172	8	39	Inf	2.73e-06	0.000308018	COAD	KIAA0284	14	105354293	105354293	A	A	G	A>G
COAD-hgsc.bcm.edu_GA	plate_id	1719	47	172	8	39	Inf	2.73e-06	0.000308018	COAD	KRTAP9-1	17	39346595	39346595	T	T	A	T>A
COAD-hgsc.bcm.edu_GA	plate_id	1719	47	172	8	39	Inf	2.73e-06	0.000308018	COAD	MDH2	7	75677504	75677504	C	C	T	C>T
COAD-hgsc.bcm.edu_GA	plate_id	1719	47	172	8	39	Inf	2.73e-06	0.000308018	COAD	TYSND1	10	71906150	71906150	T	T	C	T>C
UCEC-broad.mit.edu_GA	plate_id	A10C	7	187	4	3	202.549	3.02e-06	4.5e-05	UCEC	OR10Z1	1	158576486	158576487	-	-	G	->G
UCEC-broad.mit.edu_GA	plate_id	A10C	7	187	4	3	202.549	3.02e-06	4.5e-05	UCEC	SERPINA1	14	94844884	94844885	-	-	G	->G
LGG-broad.mit.edu_GA_automated	plate_id	A289	24	506	4	20	Inf	3.27e-06	0.000451112	LGG	HTRA2	2	74757185	74757186	-	-	G	->G
LIHC-bcgsc.ca_HiSeq_automated	plate_id	A12Z	37	165	7	30	Inf	4.2e-06	0.000430929	LIHC	CTD-2089O24.1	5	110284399	110284399	C	C	T	C>T
LIHC-bcgsc.ca_HiSeq_automated	plate_id	A12Z	37	165	7	30	Inf	4.2e-06	0.000430929	LIHC	CTD-2089O24.1	5	110284400	110284400	T	T	C	T>C
COAD-hgsc.bcm.edu_GA	plate_id	1719	47	172	9	38	39.6206	4.22e-06	0.000411613	COAD	GTPBP3	19	17448961	17448961	A	A	C	A>C
COAD-hgsc.bcm.edu_GA	plate_id	1719	47	172	9	38	39.6206	4.22e-06	0.000411613	COAD	KLHL30	2	239050033	239050033	C	C	T	C>T
COAD-hgsc.bcm.edu_GA	plate_id	1719	47	172	9	38	39.6206	4.22e-06	0.000411613	COAD	SPHK1	17	74381567	74381567	G	G	A	G>A
LUAD-broad.mit.edu_GA	plate_id	1040	7	531	4	3	82.4456	4.84e-06	1.95e-05	LUAD	KRTAP4-8	17	39253953	39253953	G	G	T	G>T
KIRC-broad.mit.edu_GA_automated	plate_id	886	25	210	6	19	63.2758	5.25e-06	2.12e-05	KIRC	EEF1B2	2	207025358	207025358	A	A	G	A>G
LUAD-broad.mit.edu_GA	plate_id	928	19	519	4	15	131.35	5.49e-06	2.15e-05	LUAD	C3	19	6697480	6697481	-	-	G	->G
LUAD-broad.mit.edu_GA	plate_id	928	19	519	4	15	131.35	5.49e-06	2.15e-05	LUAD	DDX6	11	118629613	118629614	-	-	G	->G
LUAD-broad.mit.edu_GA	plate_id	928	19	519	4	15	131.35	5.49e-06	2.15e-05	LUAD	FNDC9	5	156769909	156769910	-	-	C	->C
LUAD-broad.mit.edu_GA	plate_id	928	19	519	4	15	131.35	5.49e-06	2.15e-05	LUAD	KDM4A	1	44156564	44156565	-	-	C	->C
LUAD-broad.mit.edu_GA	plate_id	928	19	519	4	15	131.35	5.49e-06	2.15e-05	LUAD	NAV3	12	78400511	78400512	-	-	C	->C
LUAD-broad.mit.edu_GA	plate_id	928	19	519	4	15	131.35	5.49e-06	2.15e-05	LUAD	SRCAP	16	30733909	30733910	-	-	G	->G
LUAD-broad.mit.edu_GA	plate_id	928	19	519	4	15	131.35	5.49e-06	2.15e-05	LUAD	SULF1	8	70488248	70488249	-	-	G	->G
LUAD-broad.mit.edu_GA	plate_id	928	19	519	4	15	131.35	5.49e-06	2.15e-05	LUAD	TBC1D3P2	17	60351433	60351433	C	C	A	C>A
LUAD-broad.mit.edu_GA	plate_id	928	19	519	4	15	131.35	5.49e-06	2.15e-05	LUAD	TNRC6A	16	24804889	24804890	-	-	G	->G
LUAD-broad.mit.edu_GA	plate_id	969	9	529	5	4	38.926	6.28e-06	2.46e-05	LUAD	NBPF1	1	16918653	16918653	C	C	T	C>T
LUAD-broad.mit.edu_GA	plate_id	969	9	529	4	5	66.1007	7.33e-06	2.83e-05	LUAD	EMG1	12	7080212	7080213	-	-	C	->C
KIRP-hgsc.bcm.edu__Mixed_curated	plate_id	1252	10	151	4	6	Inf	7.79e-06	0.000708715	KIRP	ACSBG2	19	6177251	6177251	T	T	G	T>G
KIRC-broad.mit.edu_GA_automated	plate_id	886	25	210	5	20	Inf	9.28e-06	3.04e-05	KIRC	A2ML1	12	8998036	8998036	A	A	T	A>T
KIRC-broad.mit.edu_GA_automated	plate_id	886	25	210	5	20	Inf	9.28e-06	3.04e-05	KIRC	ACACA	17	35487100	35487101	-	-	C	->C
KIRC-broad.mit.edu_GA_automated	plate_id	886	25	210	5	20	Inf	9.28e-06	3.04e-05	KIRC	ACAD10	12	112130538	112130539	-	-	C	->C
KIRC-broad.mit.edu_GA_automated	plate_id	886	25	210	5	20	Inf	9.28e-06	3.04e-05	KIRC	ADAMTSL1	9	18829842	18829843	-	-	C	->C
KIRC-broad.mit.edu_GA_automated	plate_id	886	25	210	5	20	Inf	9.28e-06	3.04e-05	KIRC	AKAP6	14	32902724	32902725	-	-	C	->C
KIRC-broad.mit.edu_GA_automated	plate_id	886	25	210	5	20	Inf	9.28e-06	3.04e-05	KIRC	AKAP9	7	91667731	91667731	A	A	T	A>T
KIRC-broad.mit.edu_GA_automated	plate_id	886	25	210	5	20	Inf	9.28e-06	3.04e-05	KIRC	ALDH3B2	11	67433066	67433067	-	-	C	->C
KIRC-broad.mit.edu_GA_automated	plate_id	886	25	210	5	20	Inf	9.28e-06	3.04e-05	KIRC	AMHR2	12	53819644	53819645	-	-	G	->G
KIRC-broad.mit.edu_GA_automated	plate_id	886	25	210	5	20	Inf	9.28e-06	3.04e-05	KIRC	ARHGAP26	5	142586762	142586763	-	-	C	->C
KIRC-broad.mit.edu_GA_automated	plate_id	886	25	210	5	20	Inf	9.28e-06	3.04e-05	KIRC	ARHGEF15	17	8222137	8222138	-	-	G	->G
KIRC-broad.mit.edu_GA_automated	plate_id	886	25	210	5	20	Inf	9.28e-06	3.04e-05	KIRC	ATP9A	20	50305661	50305662	-	-	G	->G
KIRC-broad.mit.edu_GA_automated	plate_id	886	25	210	5	20	Inf	9.28e-06	3.04e-05	KIRC	BAG6	6	31608920	31608921	-	-	C	->C
KIRC-broad.mit.edu_GA_automated	plate_id	886	25	210	5	20	Inf	9.28e-06	3.04e-05	KIRC	C11orf49	11	47074000	47074001	-	-	C	->C
KIRC-broad.mit.edu_GA_automated	plate_id	886	25	210	5	20	Inf	9.28e-06	3.04e-05	KIRC	C2CD2L	11	118981555	118981555	A	A	T	A>T
KIRC-broad.mit.edu_GA_automated	plate_id	886	25	210	5	20	Inf	9.28e-06	3.04e-05	KIRC	C7orf10	7	40899961	40899962	-	-	C	->C
KIRC-broad.mit.edu_GA_automated	plate_id	886	25	210	5	20	Inf	9.28e-06	3.04e-05	KIRC	CA5B	X	15790675	15790676	-	-	G	->G
KIRC-broad.mit.edu_GA_automated	plate_id	886	25	210	5	20	Inf	9.28e-06	3.04e-05	KIRC	CACHD1	1	65157116	65157117	-	-	C	->C
KIRC-broad.mit.edu_GA_automated	plate_id	886	25	210	5	20	Inf	9.28e-06	3.04e-05	KIRC	CACNA1E	1	181549749	181549750	-	-	C	->C
KIRC-broad.mit.edu_GA_automated	plate_id	886	25	210	5	20	Inf	9.28e-06	3.04e-05	KIRC	CAD	2	27456981	27456982	-	-	C	->C
KIRC-broad.mit.edu_GA_automated	plate_id	886	25	210	5	20	Inf	9.28e-06	3.04e-05	KIRC	CCDC11	18	47777146	47777146	A	A	T	A>T
KIRC-broad.mit.edu_GA_automated	plate_id	886	25	210	5	20	Inf	9.28e-06	3.04e-05	KIRC	CCDC18	1	93649533	93649533	A	A	T	A>T
KIRC-broad.mit.edu_GA_automated	plate_id	886	25	210	5	20	Inf	9.28e-06	3.04e-05	KIRC	CD4	12	6923985	6923986	-	-	C	->C
KIRC-broad.mit.edu_GA_automated	plate_id	886	25	210	5	20	Inf	9.28e-06	3.04e-05	KIRC	CLDN25	11	113650550	113650551	-	-	G	->G
KIRC-broad.mit.edu_GA_automated	plate_id	886	25	210	5	20	Inf	9.28e-06	3.04e-05	KIRC	CPOX	3	98304318	98304319	-	-	G	->G
KIRC-broad.mit.edu_GA_automated	plate_id	886	25	210	5	20	Inf	9.28e-06	3.04e-05	KIRC	CRYBB1	22	26995459	26995460	-	-	G	->G
KIRC-broad.mit.edu_GA_automated	plate_id	886	25	210	5	20	Inf	9.28e-06	3.04e-05	KIRC	CTSG	14	25042847	25042848	-	-	G	->G
KIRC-broad.mit.edu_GA_automated	plate_id	886	25	210	5	20	Inf	9.28e-06	3.04e-05	KIRC	DCAF11	14	24587957	24587957	A	A	T	A>T
KIRC-broad.mit.edu_GA_automated	plate_id	886	25	210	5	20	Inf	9.28e-06	3.04e-05	KIRC	DDX6	11	118629613	118629614	-	-	G	->G
KIRC-broad.mit.edu_GA_automated	plate_id	886	25	210	5	20	Inf	9.28e-06	3.04e-05	KIRC	DGKD	2	234365951	234365952	-	-	G	->G
KIRC-broad.mit.edu_GA_automated	plate_id	886	25	210	5	20	Inf	9.28e-06	3.04e-05	KIRC	DHRSX	X	2343335	2343336	-	-	G	->G
KIRC-broad.mit.edu_GA_automated	plate_id	886	25	210	5	20	Inf	9.28e-06	3.04e-05	KIRC	DNAH3	16	20976647	20976648	-	-	G	->G
KIRC-broad.mit.edu_GA_automated	plate_id	886	25	210	5	20	Inf	9.28e-06	3.04e-05	KIRC	DNAH3	16	21063027	21063028	-	-	G	->G
KIRC-broad.mit.edu_GA_automated	plate_id	886	25	210	5	20	Inf	9.28e-06	3.04e-05	KIRC	DNAH7	2	196720569	196720569	A	A	T	A>T
KIRC-broad.mit.edu_GA_automated	plate_id	886	25	210	5	20	Inf	9.28e-06	3.04e-05	KIRC	DNMT3A	2	25523008	25523009	-	-	G	->G
KIRC-broad.mit.edu_GA_automated	plate_id	886	25	210	5	20	Inf	9.28e-06	3.04e-05	KIRC	DPYSL2	8	26513183	26513184	-	-	C	->C
KIRC-broad.mit.edu_GA_automated	plate_id	886	25	210	5	20	Inf	9.28e-06	3.04e-05	KIRC	DUOX1	15	45457005	45457006	-	-	C	->C
KIRC-broad.mit.edu_GA_automated	plate_id	886	25	210	5	20	Inf	9.28e-06	3.04e-05	KIRC	EGFLAM	5	38407191	38407192	-	-	G	->G
KIRC-broad.mit.edu_GA_automated	plate_id	886	25	210	5	20	Inf	9.28e-06	3.04e-05	KIRC	ERN2	16	23718095	23718096	-	-	G	->G
KIRC-broad.mit.edu_GA_automated	plate_id	886	25	210	5	20	Inf	9.28e-06	3.04e-05	KIRC	ETV4	17	41610700	41610701	-	-	G	->G
KIRC-broad.mit.edu_GA_automated	plate_id	886	25	210	5	20	Inf	9.28e-06	3.04e-05	KIRC	FA2H	16	74752942	74752943	-	-	G	->G
KIRC-broad.mit.edu_GA_automated	plate_id	886	25	210	5	20	Inf	9.28e-06	3.04e-05	KIRC	FCHSD1	5	141024642	141024643	-	-	G	->G
KIRC-broad.mit.edu_GA_automated	plate_id	886	25	210	5	20	Inf	9.28e-06	3.04e-05	KIRC	GABRA6	5	161116011	161116012	-	-	G	->G
KIRC-broad.mit.edu_GA_automated	plate_id	886	25	210	5	20	Inf	9.28e-06	3.04e-05	KIRC	GSTCD	4	106640215	106640215	A	A	T	A>T
KIRC-broad.mit.edu_GA_automated	plate_id	886	25	210	5	20	Inf	9.28e-06	3.04e-05	KIRC	HECTD2	10	93272060	93272061	-	-	C	->C
KIRC-broad.mit.edu_GA_automated	plate_id	886	25	210	5	20	Inf	9.28e-06	3.04e-05	KIRC	HMCN1	1	186086589	186086589	A	A	T	A>T
KIRC-broad.mit.edu_GA_automated	plate_id	886	25	210	5	20	Inf	9.28e-06	3.04e-05	KIRC	HYDIN	16	70934982	70934983	-	-	G	->G
KIRC-broad.mit.edu_GA_automated	plate_id	886	25	210	5	20	Inf	9.28e-06	3.04e-05	KIRC	IGDCC4	15	65681239	65681240	-	-	G	->G
KIRC-broad.mit.edu_GA_automated	plate_id	886	25	210	5	20	Inf	9.28e-06	3.04e-05	KIRC	IKBKB	8	42163859	42163859	A	A	T	A>T
KIRC-broad.mit.edu_GA_automated	plate_id	886	25	210	5	20	Inf	9.28e-06	3.04e-05	KIRC	IRF6	1	209974763	209974764	-	-	G	->G
KIRC-broad.mit.edu_GA_automated	plate_id	886	25	210	5	20	Inf	9.28e-06	3.04e-05	KIRC	ITGAD	16	31422475	31422476	-	-	C	->C
KIRC-broad.mit.edu_GA_automated	plate_id	886	25	210	5	20	Inf	9.28e-06	3.04e-05	KIRC	ITGAD	16	31422532	31422533	-	-	G	->G
KIRC-broad.mit.edu_GA_automated	plate_id	886	25	210	5	20	Inf	9.28e-06	3.04e-05	KIRC	ITSN1	21	35122566	35122567	-	-	C	->C
KIRC-broad.mit.edu_GA_automated	plate_id	886	25	210	5	20	Inf	9.28e-06	3.04e-05	KIRC	KEL	7	142639979	142639980	-	-	C	->C
KIRC-broad.mit.edu_GA_automated	plate_id	886	25	210	5	20	Inf	9.28e-06	3.04e-05	KIRC	KHDRBS1	1	32503458	32503459	-	-	G	->G
KIRC-broad.mit.edu_GA_automated	plate_id	886	25	210	5	20	Inf	9.28e-06	3.04e-05	KIRC	KIAA1217	10	24832466	24832467	-	-	C	->C
KIRC-broad.mit.edu_GA_automated	plate_id	886	25	210	5	20	Inf	9.28e-06	3.04e-05	KIRC	KIF13A	6	17837307	17837308	-	-	C	->C
KIRC-broad.mit.edu_GA_automated	plate_id	886	25	210	5	20	Inf	9.28e-06	3.04e-05	KIRC	KIRREL	1	158058202	158058203	-	-	C	->C
KIRC-broad.mit.edu_GA_automated	plate_id	886	25	210	5	20	Inf	9.28e-06	3.04e-05	KIRC	KLF3	4	38691475	38691476	-	-	C	->C
KIRC-broad.mit.edu_GA_automated	plate_id	886	25	210	5	20	Inf	9.28e-06	3.04e-05	KIRC	LARS	5	145523013	145523014	-	-	C	->C
KIRC-broad.mit.edu_GA_automated	plate_id	886	25	210	5	20	Inf	9.28e-06	3.04e-05	KIRC	MCM3AP	21	47663396	47663397	-	-	G	->G
KIRC-broad.mit.edu_GA_automated	plate_id	886	25	210	5	20	Inf	9.28e-06	3.04e-05	KIRC	MEI1	22	42159249	42159250	-	-	C	->C
KIRC-broad.mit.edu_GA_automated	plate_id	886	25	210	5	20	Inf	9.28e-06	3.04e-05	KIRC	MIR1208	8	129162432	129162433	-	-	G	->G
KIRC-broad.mit.edu_GA_automated	plate_id	886	25	210	5	20	Inf	9.28e-06	3.04e-05	KIRC	MRPL51	12	6602094	6602095	-	-	G	->G
KIRC-broad.mit.edu_GA_automated	plate_id	886	25	210	5	20	Inf	9.28e-06	3.04e-05	KIRC	MYCBP2	13	77641916	77641917	-	-	G	->G
KIRC-broad.mit.edu_GA_automated	plate_id	886	25	210	5	20	Inf	9.28e-06	3.04e-05	KIRC	NLRX1	11	119050610	119050611	-	-	G	->G
KIRC-broad.mit.edu_GA_automated	plate_id	886	25	210	5	20	Inf	9.28e-06	3.04e-05	KIRC	NRBP1	2	27658017	27658018	-	-	C	->C
KIRC-broad.mit.edu_GA_automated	plate_id	886	25	210	5	20	Inf	9.28e-06	3.04e-05	KIRC	OR10Z1	1	158577072	158577073	-	-	C	->C
KIRC-broad.mit.edu_GA_automated	plate_id	886	25	210	5	20	Inf	9.28e-06	3.04e-05	KIRC	OR4D11	11	59271141	59271141	A	A	T	A>T
KIRC-broad.mit.edu_GA_automated	plate_id	886	25	210	5	20	Inf	9.28e-06	3.04e-05	KIRC	OR56B1	11	5758618	5758619	-	-	C	->C
KIRC-broad.mit.edu_GA_automated	plate_id	886	25	210	5	20	Inf	9.28e-06	3.04e-05	KIRC	OR9Q1	11	57947012	57947012	A	A	T	A>T
KIRC-broad.mit.edu_GA_automated	plate_id	886	25	210	5	20	Inf	9.28e-06	3.04e-05	KIRC	PAX2	10	102509528	102509529	-	-	G	->G
KIRC-broad.mit.edu_GA_automated	plate_id	886	25	210	5	20	Inf	9.28e-06	3.04e-05	KIRC	PCDHB12	5	140588663	140588664	-	-	G	->G
KIRC-broad.mit.edu_GA_automated	plate_id	886	25	210	5	20	Inf	9.28e-06	3.04e-05	KIRC	PCED1A	20	2816203	2816204	-	-	C	->C
KIRC-broad.mit.edu_GA_automated	plate_id	886	25	210	5	20	Inf	9.28e-06	3.04e-05	KIRC	PHF12	17	27233908	27233909	-	-	G	->G
KIRC-broad.mit.edu_GA_automated	plate_id	886	25	210	5	20	Inf	9.28e-06	3.04e-05	KIRC	PLAC1	X	133700357	133700358	-	-	G	->G
KIRC-broad.mit.edu_GA_automated	plate_id	886	25	210	5	20	Inf	9.28e-06	3.04e-05	KIRC	PPFIA1	11	70194406	70194407	-	-	C	->C
KIRC-broad.mit.edu_GA_automated	plate_id	886	25	210	5	20	Inf	9.28e-06	3.04e-05	KIRC	PSMF1	20	1145690	1145691	-	-	C	->C
KIRC-broad.mit.edu_GA_automated	plate_id	886	25	210	5	20	Inf	9.28e-06	3.04e-05	KIRC	PTGER3	1	71418744	71418744	T	T	A	T>A
KIRC-broad.mit.edu_GA_automated	plate_id	886	25	210	5	20	Inf	9.28e-06	3.04e-05	KIRC	PUM1	1	31406073	31406074	-	-	G	->G
KIRC-broad.mit.edu_GA_automated	plate_id	886	25	210	5	20	Inf	9.28e-06	3.04e-05	KIRC	RAB1B	11	66039887	66039888	-	-	G	->G
KIRC-broad.mit.edu_GA_automated	plate_id	886	25	210	5	20	Inf	9.28e-06	3.04e-05	KIRC	RAI14	5	34814686	34814686	A	A	T	A>T
KIRC-broad.mit.edu_GA_automated	plate_id	886	25	210	5	20	Inf	9.28e-06	3.04e-05	KIRC	RBM23	14	23371029	23371030	-	-	G	->G
KIRC-broad.mit.edu_GA_automated	plate_id	886	25	210	5	20	Inf	9.28e-06	3.04e-05	KIRC	RNF168	3	196210676	196210676	A	A	T	A>T
KIRC-broad.mit.edu_GA_automated	plate_id	886	25	210	5	20	Inf	9.28e-06	3.04e-05	KIRC	RPS6KA1	1	26885310	26885311	-	-	C	->C
KIRC-broad.mit.edu_GA_automated	plate_id	886	25	210	5	20	Inf	9.28e-06	3.04e-05	KIRC	RSF1	11	77412023	77412024	-	-	G	->G
KIRC-broad.mit.edu_GA_automated	plate_id	886	25	210	5	20	Inf	9.28e-06	3.04e-05	KIRC	RYR3	15	34015000	34015001	-	-	G	->G
KIRC-broad.mit.edu_GA_automated	plate_id	886	25	210	5	20	Inf	9.28e-06	3.04e-05	KIRC	SALL2	14	21992275	21992276	-	-	G	->G
KIRC-broad.mit.edu_GA_automated	plate_id	886	25	210	5	20	Inf	9.28e-06	3.04e-05	KIRC	SEMA4F	2	74906845	74906846	-	-	C	->C
KIRC-broad.mit.edu_GA_automated	plate_id	886	25	210	5	20	Inf	9.28e-06	3.04e-05	KIRC	SLC18A1	8	20004787	20004788	-	-	G	->G
KIRC-broad.mit.edu_GA_automated	plate_id	886	25	210	5	20	Inf	9.28e-06	3.04e-05	KIRC	SLC43A1	11	57256464	57256464	T	T	A	T>A
KIRC-broad.mit.edu_GA_automated	plate_id	886	25	210	5	20	Inf	9.28e-06	3.04e-05	KIRC	SNRNP70	19	49589711	49589712	-	-	C	->C
KIRC-broad.mit.edu_GA_automated	plate_id	886	25	210	5	20	Inf	9.28e-06	3.04e-05	KIRC	SSU72	1	1500119	1500120	-	-	G	->G
KIRC-broad.mit.edu_GA_automated	plate_id	886	25	210	5	20	Inf	9.28e-06	3.04e-05	KIRC	SYNGAP1	6	33405504	33405505	-	-	C	->C
KIRC-broad.mit.edu_GA_automated	plate_id	886	25	210	5	20	Inf	9.28e-06	3.04e-05	KIRC	TARBP2	12	53898183	53898184	-	-	C	->C
KIRC-broad.mit.edu_GA_automated	plate_id	886	25	210	5	20	Inf	9.28e-06	3.04e-05	KIRC	TATDN2	3	10312538	10312539	-	-	G	->G
KIRC-broad.mit.edu_GA_automated	plate_id	886	25	210	5	20	Inf	9.28e-06	3.04e-05	KIRC	TBC1D8B	X	106109045	106109045	A	A	T	A>T
KIRC-broad.mit.edu_GA_automated	plate_id	886	25	210	5	20	Inf	9.28e-06	3.04e-05	KIRC	TLL2	10	98164994	98164995	-	-	G	->G
KIRC-broad.mit.edu_GA_automated	plate_id	886	25	210	5	20	Inf	9.28e-06	3.04e-05	KIRC	TMPRSS6	22	37499435	37499436	-	-	G	->G
KIRC-broad.mit.edu_GA_automated	plate_id	886	25	210	5	20	Inf	9.28e-06	3.04e-05	KIRC	TRIM33	1	114968131	114968131	A	A	T	A>T
KIRC-broad.mit.edu_GA_automated	plate_id	886	25	210	5	20	Inf	9.28e-06	3.04e-05	KIRC	TUBB4A	19	6496087	6496088	-	-	C	->C
KIRC-broad.mit.edu_GA_automated	plate_id	886	25	210	5	20	Inf	9.28e-06	3.04e-05	KIRC	UBBP4	17	21731033	21731034	-	-	C	->C
KIRC-broad.mit.edu_GA_automated	plate_id	886	25	210	5	20	Inf	9.28e-06	3.04e-05	KIRC	USP9X	X	40982956	40982957	-	-	C	->C
KIRC-broad.mit.edu_GA_automated	plate_id	886	25	210	5	20	Inf	9.28e-06	3.04e-05	KIRC	UST	6	149395141	149395142	-	-	C	->C
KIRC-broad.mit.edu_GA_automated	plate_id	886	25	210	5	20	Inf	9.28e-06	3.04e-05	KIRC	VARS	6	31759454	31759455	-	-	G	->G
KIRC-broad.mit.edu_GA_automated	plate_id	886	25	210	5	20	Inf	9.28e-06	3.04e-05	KIRC	VPRBP	3	51457614	51457615	-	-	G	->G
KIRC-broad.mit.edu_GA_automated	plate_id	886	25	210	5	20	Inf	9.28e-06	3.04e-05	KIRC	YLPM1	14	75248518	75248519	-	-	C	->C
KIRC-broad.mit.edu_GA_automated	plate_id	886	25	210	5	20	Inf	9.28e-06	3.04e-05	KIRC	ZFYVE27	10	99510176	99510177	-	-	G	->G
KIRC-broad.mit.edu_GA_automated	plate_id	886	25	210	5	20	Inf	9.28e-06	3.04e-05	KIRC	ZNF512	2	27838033	27838033	A	A	T	A>T
KIRC-broad.mit.edu_GA_automated	plate_id	886	25	210	5	20	Inf	9.28e-06	3.04e-05	KIRC	ZNF608	5	123984683	123984684	-	-	C	->C
KIRC-broad.mit.edu_GA_automated	plate_id	886	25	210	5	20	Inf	9.28e-06	3.04e-05	KIRC	ZNF625	19	12256750	12256751	-	-	C	->C
KIRC-broad.mit.edu_GA_automated	plate_id	886	25	210	5	20	Inf	9.28e-06	3.04e-05	KIRC	ZNF70	22	24087085	24087086	-	-	G	->G

## Sheet: Table S3
Table S3. List of batch-biased genes among the SMGs
SMG	Chr	Start	End	Mutation type	AA Change	Cancer type (Batch ID)
ARID1A	chr1	27105930	27105931	->G	G1847fs	KIRC (0886), LUAD (0928)
AXIN2	chr17	63532584	63532585	->C	G665fs	KIRC (0886)
DNMT3A	chr2	25523008	25523009	->G	P59fs	KIRC (0886)
EP300	chr22	41574678	41574679	->C	Q2321fs	KIRC (0886), LUAD (A10C)
KMT2D	chr12	49445525	49445526	->G	P647fs	KIRC (0886), LUAD (0928)
NAV3	chr12	78400511	78400512	->C	R398fs	KIRC (0886), LUAD (0928)
TSHZ3	chr19	31769061	31769062	->C	G546fs	KIRC (0886), LUAD (0928)
TSHZ3	chr19	31769141	31769142	->C	L520fs	KIRC (0886), LUAD (0928)
USP9X	chrX	40982956	40982957	->C	Q25fs	KIRC (0886), LUAD (0928)
